# Supplementary material for: A CDK-11/SAP30BP/CYL-1 Complex Links Pre-mRNA Splicing to Developmental Cell Fate Decisions
Source: Research Square preprint supplement (doi:10.21203/rs.3.rs-7629361/v1), 2025-10-07
Supplement: Supplementary file 1 [file 1275fe02a7d65c6089cecd59.xlsx]

## Sheet: results
Supplemental Table S1: Fulll list of in vivo interacting partners ranked by WD score
WB_ID	WD_score	Gene Name	Tx_ID	Brief description	Automated description
WBGene00022057	5576	eelo-1	Y67D2.7		Predicted to be involved in regulation of transcription, DNA-templated. Predicted to be located in nucleus. Is an ortholog of human SAP30BP (SAP30 binding protein).
WBGene00015203	5123.69	cdk-11.1	B0495.2		Predicted to enable cyclin-dependent protein serine/threonine kinase activity. Involved in gamete generation and positive regulation of embryonic development. Located in cytoplasm and nucleus. Expressed in gonadal sheath cell; somatic cell; and somatic gonad. Is an ortholog of human CDK11A (cyclin dependent kinase 11A) and CDK11B (cyclin dependent kinase 11B).
WBGene00013917	3986.8	cdk-11.2	ZC504.3		Predicted to enable cyclin-dependent protein serine/threonine kinase activity. Involved in positive regulation of embryonic development. Located in cytoplasm and nucleus. Expressed in gonad; gonadal sheath cell; somatic cell; and somatic gonad. Is an ortholog of human CDK11A (cyclin dependent kinase 11A) and CDK11B (cyclin dependent kinase 11B).
WBGene00000876	2832.69	cyl-1	C52E4.6		Predicted to enable cyclin-dependent protein serine/threonine kinase regulator activity. Predicted to be involved in regulation of transcription by RNA polymerase II. Predicted to be located in nucleus. Is an ortholog of human CCNL2 (cyclin L2).
WBGene00007135	1496.53	cdk-12	B0285.1		Predicted to enable RNA polymerase II CTD heptapeptide repeat kinase activity; cyclin binding activity; and cyclin-dependent protein serine/threonine kinase activity. Involved in nematode larval development; phosphorylation of RNA polymerase II C-terminal domain; and regulation of histone H3-K36 trimethylation. Located in transcriptionally active chromatin. Predicted to be part of cyclin/CDK posi…
WBGene00008922	246.166	F17C11.11	F17C11.11		Enriched in AFD; NSM; body wall musculature; intestine; and somatic gonad precursor based on RNA-seq and microarray studies. Is affected by several genes including daf-2; rrf-3; and daf-12 based on microarray; tiling array; RNA-seq; and proteomic studies. Is affected by nineteen chemicals including 1-methylnicotinamide; Tunicamycin; and levamisole based on RNA-seq and microarray studies.
WBGene00004423	38.8029	rpl-11.2	F07D10.1	rpl-11.2 encodes a large ribosomal subunit L11 protein; by homology, RPL-11.2 is predicted to function in protein biosynthesis.	Predicted to enable RNA binding activity. Predicted to be a structural constituent of ribosome. Predicted to be located in cytoplasm; nucleus; and ribosome. Predicted to be part of cytosolic large ribosomal subunit. Expressed in embryonic cell; head; posterior gonad arm; and tail. Human ortholog(s) of this gene implicated in Diamond-Blackfan anemia 7 and T-cell acute lymphoblastic leukemia. Is an…
WBGene00001784	29.0984	gst-36	R07B1.4		Predicted to enable glutathione peroxidase activity and glutathione transferase activity. Predicted to be involved in glutathione metabolic process and obsolete oxidation-reduction process. Is an ortholog of human HPGDS (hematopoietic prostaglandin D synthase).
WBGene00006541	27.0105	tbh-1	H13N06.6	tbh-1 encodes a tyramine beta-hydroxylase orthologous to human DBH (OMIM:609312, mutated in dopamine beta-hydroxylase deficiency); TBH-1 activity is required for biosynthesis of the octopamine neurotransmitter.	Enables tyramine-beta hydroxylase activity. Involved in octopamine biosynthetic process. Located in synapse. Expressed in RICL; RICR; and gonad. Human ortholog(s) of this gene implicated in several diseases, including alcohol use disorder; attention deficit hyperactivity disorder; and dopamine beta-hydroxylase deficiency. Is an ortholog of human DBH (dopamine beta-hydroxylase).
WBGene00017771	24.1421	F25B4.8	F25B4.8		Predicted to enable carbon-sulfur lyase activity and metal ion binding activity. Is an ortholog of human CENPV (centromere protein V).
WBGene00014108	16.2303	ZK856.7	ZK856.7		Enriched in amphid sheath cell; intestine; and muscle cell based on RNA-seq and microarray studies. Is affected by several genes including daf-16; daf-2; and glp-1 based on microarray; tiling array; proteomic; and RNA-seq studies. Is affected by thirteen chemicals including rotenone; stavudine; and Zidovudine based on RNA-seq and microarray studies.
WBGene00001501	12.8695	ftn-2	D1037.3	ftn-2 encodes one of two C. elegans ferritin heavy chain homologs; loss of ftn-2 activity via deletion mutation results in slightly lower brood sizes and, under iron stress conditions, slightly faster growth from the L4 to adult stage of development, and slightly reduced lifespan; an ftn-2::gfp reporter fusion is expressed in diverse tissues, including the pharynx, intestine, and hypodermis, and …	Enables identical protein binding activity. Involved in defense response to Gram-positive bacterium. Predicted to be located in cytoplasm. Expressed in body wall musculature and hypodermis. Human ortholog(s) of this gene implicated in several diseases, including COVID-19; hemochromatosis type 5; and hyperferritinemia-cataract syndrome. Is an ortholog of human FTH1 (ferritin heavy chain 1) and FTM…
WBGene00004440	12.8259	rpl-26	F28C6.7	rpl-26 encodes a large ribosomal subunit L26 protein; by homology, RPL-26 is predicted to function in protein biosynthesis; in C. elegans, RPL-26 activity is required for embryonic and germline development and normal rates of postembryonic growth.	Predicted to enable RNA binding activity. Predicted to be a structural constituent of ribosome. Predicted to be involved in cytoplasmic translation and ribosomal large subunit biogenesis. Predicted to be located in ribosome. Predicted to be part of cytosolic large ribosomal subunit. Human ortholog(s) of this gene implicated in Diamond-Blackfan anemia 11. Is an ortholog of human RPL26 (ribosomal p…
WBGene00000064	12.3941	act-2	T04C12.5	act-2 encodes one of five C. elegans actins; act-2 functions redundantly in early embryonic cortical microfilaments with act-1 and act-3, and dominant mutations in act-2 result in uncoordinated locomotion; an ACT-2::GFP reporter fusion is expressed in the cytoplasm of embryonic cells and is also found in contractile filaments in adult muscle cells.	Predicted to enable ATP binding activity. Involved in several processes, including cortical actin cytoskeleton organization; cytoskeleton-dependent cytokinesis; and embryo development. Located in actin filament and cell cortex. Expressed in body wall musculature; gonad; hypodermis; and neurons. Human ortholog(s) of this gene implicated in Baraitser-Winter syndrome; autosomal dominant nonsyndromic…
WBGene00019947	12.3006	htz-1	R08C7.3	htz-1 encodes the C. elegans ortholog of the H2A.Z histone variant; htz-1 is an essential gene and during development, HTZ-1 functions with the PHA-4/FoxA transcription factor and the MYS-1/TIP60-SSL-1/SWR1 remodeling complex to regulate gene expression during pharyngeal (foregut) organogenesis; a YFP::HTZ-1 fusion protein localizes to pharyngeal gene promoters at the onset of transcription, in a…	Predicted to enable DNA binding activity. Involved in negative regulation of cell fate specification and negative regulation of transcription, DNA-templated. Located in chromatin; condensed chromosome; and nucleus. Predicted to be part of nucleosome. Expressed in several structures, including distal tip cell and somatic gonad. Is an ortholog of human H2AZ1 (H2A.Z variant histone 1) and H2AZ2 (H2A…
WBGene00001502	11.8955	ftt-2	F52D10.3	ftt-2 encodes a 14-3-3 protein; FTT-2 is required for regulating the localization of the product of YAP-1, a Yes-associated protein (Yap) homolog, between the cytoplasm and the nucleus.	Involved in cytoplasmic sequestering of protein; dauer larval development; and negative regulation of protein import into nucleus. Located in cytoplasm and nucleus. Expressed in several structures, including C; E; Psub3; gonad; and intestine. Human ortholog(s) of this gene implicated in several diseases, including Creutzfeldt-Jakob disease; carcinoma (multiple); and developmental and epileptic en…
WBGene00001976	11.7873	hmg-11	T05A7.4		Predicted to enable DNA binding activity. Expressed in head.
WBGene00001169	11.6488	eef-1A.2	R03G5.1	eef-1A.2 encodes a translation elongation factor 1-alpha homolog that is required for embryonic viability, fertility, and a normal postembryonic growth rate; eef-1A.2 encodes at least one alternatively spliced coding sequence identical to that of eef-1A.1.	Predicted to enable GTP binding activity; GTPase activity; and translation elongation factor activity. Predicted to be involved in translational elongation. Human ortholog(s) of this gene implicated in Alzheimer's disease; autosomal dominant non-syndromic intellectual disability 38; developmental and epileptic encephalopathy 33; and ovarian cancer. Is an ortholog of human EEF1A1 (eukaryotic trans…
WBGene00006530	11.3914	tba-4	F44F4.11	tba-4 encodes a member of the alpha tubulin family that also includes tba-1, tba-2, and tba-3, and affects embryonic viability.	Predicted to enable GTP binding activity. Predicted to be a structural constituent of cytoskeleton. Predicted to be involved in microtubule cytoskeleton organization and mitotic cell cycle. Predicted to be located in cytoplasm and microtubule. Human ortholog(s) of this gene implicated in amyotrophic lateral sclerosis type 22. Is an ortholog of human TUBA4A (tubulin alpha 4a) and TUBA8 (tubulin al…
WBGene00001898	11.0379	his-24	M163.3	his-24 encodes one of eight C. elegans H1 linker histones; HIS-24, along with the histone deacetylase SIR-2.1 and the Enhancer of zeste E(Z) ortholog MES-2, plays a key role in heterochromatin regulation and thus, in regulation of fertility and embryonic development; specifically, HIS-24 and SIR-2.1 are essential for maintenance of the histone H3K27me3 mark at subtelomeric regions in the C. elega…	Predicted to enable double-stranded DNA binding activity and nucleosomal DNA binding activity. Predicted to be involved in DNA packaging and regulation of nucleobase-containing compound metabolic process. Located in chromosome, telomeric region; cytoplasm; and nucleus. Predicted to be part of nucleosome. Expressed in several structures, including germ line and gonad. Is an ortholog of human H1-0 …
WBGene00001154	10.684	ech-5	F56B3.5		Predicted to enable enoyl-CoA hydratase activity. Predicted to be involved in fatty acid beta-oxidation. Predicted to be located in mitochondrion. Human ortholog(s) of this gene implicated in 3-methylglutaconic aciduria type 1 and renal tubular transport disease. Is an ortholog of human AUH (AU RNA binding methylglutaconyl-CoA hydratase).
WBGene00003799	10.6288	npp-13	Y37E3.15		Predicted to be a structural constituent of nuclear pore. Involved in several processes, including organelle organization; protein import into nucleus; and regulation of cell cycle. Predicted to be located in membrane and nucleus. Predicted to be part of nuclear pore. Human ortholog(s) of this gene implicated in nephrotic syndrome type 12. Is an ortholog of human NUP93 (nucleoporin 93).
WBGene00001883	10.5809	his-9	ZK131.3	his-9 encodes an H3 histone; by homology, HIS-9 is predicted to function as a nucleosome component required for packaging of DNA into chromatin; his-9 is a replication-dependent histone locus that resides in the HIS3 cluster on chromosome II.	Predicted to enable DNA binding activity and protein heterodimerization activity. Predicted to be part of nucleosome. Expressed in several structures, including MI neuron and e3D.
WBGene00004443	10.3521	rpl-29	B0513.3	rpl-29 encodes a large ribosomal subunit L29 protein; by homology, RPL-29 is predicted to function in protein biosynthesis; in C. elegans, loss of rpl-29 function via RNA-mediated interference (RNAi) does not result in any obvious abnormalities.	Predicted to be a structural constituent of ribosome. Predicted to be involved in cytoplasmic translation. Predicted to be located in ribosome. Predicted to be part of cytosolic large ribosomal subunit. Is an ortholog of human RPL29 (ribosomal protein L29).
WBGene00004452	9.9711	rpl-38	C06B8.8	rpl-38 encodes a large ribosomal subunit L38 protein.	Predicted to be a structural constituent of ribosome. Predicted to be involved in ribonucleoprotein complex assembly. Predicted to be located in ribosome. Predicted to be part of cytosolic large ribosomal subunit. Is an ortholog of human RPL38 (ribosomal protein L38).
WBGene00000063	9.705	act-1	T04C12.6	act-1 encodes an actin isoform that is required for proper body wall muscle and pharyngeal muscle structures and the motility of animals; actins have highly similar amino acid sequences; ACT-1 is identical to ACT-3; act-1 functions redundantly with two other actin isoforms, act-2 and act-3, to control cytoplasmic microfilament function in the early embryo.	Predicted to be a structural constituent of cytoskeleton. Involved in cortical actin cytoskeleton organization; embryo development; and mitotic cytokinesis. Located in striated muscle thin filament. Expressed in body wall musculature and gonad. Human ortholog(s) of this gene implicated in Baraitser-Winter syndrome; autosomal dominant nonsyndromic deafness 20; and hand, foot and mouth disease. Is …
WBGene00004454	9.696	rpl-36.A	C09H10.2		Predicted to be a structural constituent of ribosome. Predicted to be involved in translation. Predicted to be located in ribosome. Predicted to be part of cytosolic large ribosomal subunit. Is an ortholog of human RPL36AL (ribosomal protein L36a like).
WBGene00010478	9.6766	K01G5.5	K01G5.5	The K01G5.5 gene encodes an ortholog of human DYSKERIN (DKC1; OMIM:300126), which when mutated leads to X-linked dyskeratosis congenita (OMIM:305000); the K01G5.5 protein is predicted to be mitochondrial with 68% accuracy.	Predicted to enable pseudouridine synthase activity. Predicted to be involved in box H/ACA RNA 3'-end processing and pseudouridine synthesis. Predicted to be located in nucleolus. Predicted to be part of box H/ACA snoRNP complex. Human ortholog(s) of this gene implicated in X-linked dyskeratosis congenita and aplastic anemia. Is an ortholog of human DKC1 (dyskerin pseudouridine synthase 1).
WBGene00004419	9.6722	rpl-7A	Y24D9A.4	rpl-7A encodes a large ribosomal subunit L7a protein required in mass RNAi assays for fertility, vulval development, and general health; the rpl-7A transcription unit has one nonsense transcript that is up-regulated in vivo by smg[-] mutations, indicating that rpl-7A is a natural substrate for SMG-mediated nonsense suppresssion; several other natural mRNA substrates of SMG suppression (e.g., rpl-…	Enables calmodulin binding activity. Predicted to be involved in maturation of LSU-rRNA. Predicted to be located in ribosome. Predicted to be part of cytosolic large ribosomal subunit. Is an ortholog of human RPL7A (ribosomal protein L7a).
WBGene00004493	9.6341	rps-24	T07A9.11	rps-24 encodes a small ribosomal subunit S24 protein; by homology, RPS-24 is predicted to function in protein biosynthesis; in C. elegans, RPS-24 activity is required for germline development and the overall health of the animal.	Predicted to be a structural constituent of ribosome. Predicted to be involved in translation. Predicted to be located in ribosome. Human ortholog(s) of this gene implicated in Diamond-blackfan anemia 3. Is an ortholog of human RPS24 (ribosomal protein S24).
WBGene00006789	9.5014	unc-54	F11C3.3	unc-54 encodes a muscle myosin class II heavy chain (MHC B); UNC-54 is the major myosin heavy chain expressed in C. elegans and is required for locomotion and egg-laying; in vivo and in vitro, UNC-54 interacts with ITR-1, an IP3 receptor, and this interaction may provide a link between calcium signaling and the muscle cytoskeleton; UNC-54 is a thick filament component that is expressed in multipl…	Enables actin filament binding activity and microfilament motor activity. A structural constituent of muscle. Involved in several processes, including muscle contraction; oviposition; and skeletal muscle myosin thick filament assembly. Located in A band and striated muscle myosin thick filament. Part of muscle myosin complex. Expressed in anal depressor muscle; body wall musculature; head; vulval…
WBGene00000472	9.2408	cey-1	F33A8.3	cey-1 encodes a protein with a cold-shock/Y-box domain that is expressed in early embryonic blastomeres (at the 15-cell stage, i.e., pre-gastrulation), but is normally repressed in early germline blastomeres by PIE-1.	Predicted to enable nucleic acid binding activity. Predicted to be involved in regulation of gene expression. Located in endoplasmic reticulum. Expressed in germ cell; germ line; pharynx; and somatic cell. Is an ortholog of human YBX3 (Y-box binding protein 3).
WBGene00016943	9.2124	acdh-1	C55B7.4	acdh-1 encodes a short-chain acyl-CoA dehydrogenase; ACDH-1 is predicted to be a mitochondrial enzyme that catalyzes the first step of fatty acid beta-oxidation and thus plays a key role in energy production; steady-state acdh-1 mRNA levels are under the control of the MDT-15 mediator complex subunit; in addition, gene expression studies indicate that acdh-1 expression is upregulated in daf-2 mut…	Predicted to enable flavin adenine dinucleotide binding activity and oxidoreductase activity, acting on the CH-CH group of donors. Involved in defense response to Gram-negative bacterium and innate immune response. Expressed in E lineage cell. Is an ortholog of human ACADSB (acyl-CoA dehydrogenase short/branched chain).
WBGene00000473	8.9463	cey-2	F46F11.2	cey-2 encodes a cold-shock/Y-box domain-containing protein; by homology, CEY-2 is predicted to function as either an RNA-binding protein involved in translation or RNA processing, or a DNA-binding protein involved in transcriptional regulation; cey-2 mRNA is expressed maternally in the early embryo, in a pattern characteristic of class II maternal RNAs, which are initially detected throughout the…	Predicted to enable nucleic acid binding activity. Predicted to be involved in regulation of gene expression. Predicted to be located in nucleus. Part of ribonucleoprotein complex. Expressed in germ cell; germ line; pharynx; and somatic cell. Is an ortholog of human YBX1 (Y-box binding protein 1).
WBGene00002005	8.4817	hsp-1	F26D10.3	hsp-1 encodes hsp70A, a member of the heat shock family of proteins; hsp70A is closely related to the Drosophila heat inducible hsp70s and the S. cerevisiae SSA hsp70 subfamily; the hsp-1 gene is normally expressed throughout development and upon heat-shock the hsp-1 mRNA is enhanced 2-6 fold; down-regulation of hsp-1 via RNA interference results in a small reduction in the life-span of an age-1 …	Enables ATP hydrolysis activity. Involved in determination of adult lifespan; response to heat; and retrograde transport, endosome to Golgi. Located in cytosol and nucleus. Expressed in germ line and intestine. Human ortholog(s) of this gene implicated in several diseases, including Alzheimer's disease; autoimmune disease (multiple); brain disease (multiple); and eye disease (multiple). Is an ort…
WBGene00004456	8.4194	rpl-43	Y48B6A.2	rpl-43 encodes a large ribosomal subunit L37a protein.	Predicted to enable metal ion binding activity. Predicted to be a structural constituent of ribosome. Predicted to be involved in translation. Predicted to be located in ribosome. Is an ortholog of human RPL37A (ribosomal protein L37a).
WBGene00014095	7.9533	gdh-1	ZK829.4	gdh-1 encodes a glutamate dehydrogenase, required in mass RNAi assays for normal fertility and rapid growth, that is expressed in larval and adult pharynx, intestine, and rectal gland cells; GDH-1 is orthologous to human GLUD1 (OMIM:138130, mutated in hyperinsulinemic hypoglycemia and hyperammonemia) and GLUD2 (OMIM:300144).	Predicted to enable glutamate dehydrogenase (NAD+) activity. Predicted to be involved in glutamate catabolic process. Predicted to be located in mitochondrion. Expressed in head; intestine; pharynx; rectal gland cell; and tail. Human ortholog(s) of this gene implicated in Alzheimer's disease; familial hyperinsulinemic hypoglycemia 6; glucose metabolism disease (multiple); and late onset Parkinson…
WBGene00004447	7.8642	rpl-33	F10E7.7	rpl-33 encodes a large ribosomal subunit L35a protein.	Predicted to be a structural constituent of ribosome. Predicted to be involved in cytoplasmic translation and ribosomal large subunit biogenesis. Predicted to be located in ribosome. Predicted to be part of cytosolic large ribosomal subunit. Human ortholog(s) of this gene implicated in Diamond-Blackfan anemia 5 and glioblastoma. Is an ortholog of human RPL35A (ribosomal protein L35a).
WBGene00000067	7.8322	act-5	T25C8.2	act-5 encodes an ortholog of human cytoplasmic actin; act-5 is required for formation of the terminal web and microvilli on the apical surface of intestinal cells; act-5 also plays a role in mediating non-lytic exit of intracellular parasites from the intestine; act-5 is expressed only in intestinal cells and in the excretory cell; in the intestine, ACT-5 localizes to microvilli and the terminal …	Involved in several processes, including larval feeding behavior; microvillus assembly; and positive regulation of eating behavior. Located in microvillar actin bundle and terminal web. Expressed in excretory cell; gonad; intestine; pharyngeal-intestinal valve; and rectal gland cell.
WBGene00000475	7.7605	cey-4	Y39A1C.3	cey-4 encodes a Y box-containing protein with no known function in vivo;CEY-4 associates with CGH-1 and CEY-2/3 in cytoplasmic particles of thegonad and early embryo.	Enables ribonucleoprotein complex binding activity. Predicted to be involved in regulation of gene expression. Predicted to be located in nucleus. Part of ribonucleoprotein complex. Expressed in germ cell; germ line; and somatic cell. Is an ortholog of human YBX1 (Y-box binding protein 1) and YBX2 (Y-box binding protein 2).
WBGene00004489	7.7469	rps-20	Y105E8A.16	rps-20 encodes a small ribosomal subunit S20 protein.	Predicted to be a structural constituent of ribosome. Predicted to be involved in translation. Predicted to be located in ribosome. Predicted to be part of cytosolic small ribosomal subunit. Is an ortholog of human RPS20 (ribosomal protein S20).
WBGene00003920	7.7332	par-5	M117.2	PAR-5 encodes one of two C. elegans 14-3-3 proteins; par-5 is essential for early embryonic development, particularly for early embryonic asymmetry; PAR-5 also functions in a Wnt/MAPK signaling pathway to regulate the nuclear level of the POP-1/TCF transcription factor; PAR-5 has been shown to physically interact with a number of proteins, including those involved in G protein signaling pathways …	Involved in several processes, including cell fate commitment; establishment of localization in cell; and first cell cycle pseudocleavage. Located in cell cortex and nucleus. Expressed in head neurons. Human ortholog(s) of this gene implicated in several diseases, including Creutzfeldt-Jakob disease; carcinoma (multiple); and developmental and epileptic encephalopathy 56. Is an ortholog of human …
WBGene00004414	7.6676	rpl-3	F13B10.2	rpl-3 encodes a large ribosomal subunit L3 protein required in mass RNAi assays for embryonic and larval viability, fertility, and general health; the rpl-3 transcription unit has a nonsense transcript that is up-regulated in vivo by smg[-] mutations, indicating that rpl-3 is a natural substrate for SMG-mediated nonsense suppresssion; several other natural mRNA substrates of SMG suppression (e.g.…	Predicted to enable RNA binding activity. Predicted to be a structural constituent of ribosome. Predicted to be involved in ribosomal large subunit assembly. Predicted to be located in cytoplasm and ribosome. Predicted to be part of cytosolic large ribosomal subunit. Human ortholog(s) of this gene implicated in dilated cardiomyopathy. Is an ortholog of human RPL3 (ribosomal protein L3).
WBGene00004425	7.5617	rpl-13	C32E8.2	rpl-13 encodes a large ribosomal subunit L13 protein.	Predicted to enable RNA binding activity. Predicted to be a structural constituent of ribosome. Predicted to be involved in translation. Predicted to be located in cytosol. Predicted to be part of cytosolic large ribosomal subunit. Is an ortholog of human RPL13 (ribosomal protein L13).
WBGene00004438	7.5094	rpl-25.1	F55D10.2	rpl-25.1 encodes a large ribosomal subunit L23a protein.	Predicted to be a structural constituent of ribosome. Predicted to be involved in ribosomal large subunit assembly. Predicted to be located in ribosome. Predicted to be part of cytosolic large ribosomal subunit. Is an ortholog of human RPL23A (ribosomal protein L23a).
WBGene00004478	7.0337	rps-9	F40F8.10	rps-9 encodes a small ribosomal subunit S9 protein.	Predicted to enable rRNA binding activity. Predicted to be a structural constituent of ribosome. Predicted to be involved in positive regulation of translational fidelity. Predicted to be located in ribosome. Predicted to be part of cytosolic small ribosomal subunit. Is an ortholog of human RPS9 (ribosomal protein S9).
WBGene00003470	7.0049	msp-152	ZK546.6	msp-152 encodes a protein that belongs to a family of proteins called the Major Sperm Proteins (MSPs) that is conserved in nematodes; this family consists of closely related, small, basic proteins that make up 15% of sperm protein; this multigene family consists of over fifty genes, including many pseudogenes; MSPs are involved in both extracellular signaling and cytoskeletal functions during rep…	Predicted to be located in cytoplasm; cytoskeleton; and pseudopodium. Expressed in gonad; oocyte; and sperm.
WBGene00009952	6.9341	acaa-2	F53A2.7		Predicted to enable acetyl-CoA C-acetyltransferase activity. Predicted to be involved in fatty acid beta-oxidation. Predicted to be located in mitochondrion. Is an ortholog of human ACAA2 (acetyl-CoA acyltransferase 2).
WBGene00004418	6.8583	rpl-7	F53G12.10	rpl-7 encodes a large ribosomal subunit L7 protein required in mass RNAi assays for embryonic viability and normally rapid growth.	Predicted to enable RNA binding activity. Predicted to be a structural constituent of ribosome. Predicted to be involved in maturation of LSU-rRNA from tricistronic rRNA transcript (SSU-rRNA, 5.8S rRNA, LSU-rRNA). Predicted to be located in ribosome. Predicted to be part of cytosolic large ribosomal subunit. Is an ortholog of human RPL7 (ribosomal protein L7).
WBGene00004415	6.8481	rpl-4	B0041.4	rpl-4 encodes a large ribosomal subunit L4 protein.	Predicted to enable RNA binding activity. Predicted to be a structural constituent of ribosome. Involved in determination of adult lifespan. Predicted to be located in ribosome. Predicted to be part of cytosolic large ribosomal subunit. Is an ortholog of human RPL4 (ribosomal protein L4).
WBGene00001886	6.8389	his-12	ZK131.6	his-12 encodes an H2A histone; his-12 is contained within the histone gene cluster HIS3.	Predicted to enable DNA binding activity and protein heterodimerization activity. Predicted to be part of nucleosome.
WBGene00004477	6.82	rps-8	F42C5.8	rps-8 encodes a small ribosomal subunit S8 protein; by homology, RPS-8 is predicted to function in protein biosynthesis; in C. elegans, RPS-8 activity is required for germline development and the overall health of the animal.	Predicted to be a structural constituent of ribosome. Predicted to be involved in maturation of SSU-rRNA from tricistronic rRNA transcript (SSU-rRNA, 5.8S rRNA, LSU-rRNA). Predicted to be located in ribosome. Predicted to be part of cytosolic small ribosomal subunit. Is an ortholog of human RPS8 (ribosomal protein S8).
WBGene00004412	6.7852	rpl-1	Y71F9AL.13	rpl-1 encodes a large ribosomal subunit L10a protein; by homology, RPL-1 is predicted to function in protein biosynthesis; in C. elegans, RPL-1 activity is essential for embryonic development.	Predicted to enable RNA binding activity. Predicted to be involved in maturation of LSU-rRNA. Predicted to be located in ribosome. Predicted to be part of cytosolic large ribosomal subunit. Is an ortholog of human RPL10A (ribosomal protein L10a).
WBGene00004490	6.7535	rps-21	F37C12.11	rps-21 encodes a small ribosomal subunit S21 protein; by homology, RPS-21 is predicted to function in protein biosynthesis; in C. elegans, RPS-21 activity is required for embryonic and germline development, as well as the overall health of the animal.	Predicted to be a structural constituent of ribosome. Predicted to be involved in endonucleolytic cleavage in ITS1 to separate SSU-rRNA from 5.8S rRNA and LSU-rRNA from tricistronic rRNA transcript (SSU-rRNA, 5.8S rRNA, LSU-rRNA) and endonucleolytic cleavage to generate mature 3'-end of SSU-rRNA from (SSU-rRNA, 5.8S rRNA, LSU-rRNA). Predicted to be located in cytosol; ribosome; and rough endoplas…
WBGene00000229	6.7301	atp-2	C34E10.6	atp-2 encodes the beta subunit of the soluble, catalytic F1 portion of ATP synthase (mitochondrial respiratory chain [MRC] complex V); atp-2 activity is required for embryonic and larval development past the L3 stage, as well as for normal mobility, pharyngeal pumping, defecation, growth rate, and larval lifespan; in males, atp-2 activity is also required cell autonomously in male-specific sensor…	Enables protein domain specific binding activity. Predicted to contribute to proton-transporting ATP synthase activity, rotational mechanism. Involved in several processes, including determination of adult lifespan; inductive cell migration; and pharyngeal pumping. Located in mitochondrion and non-motile cilium. Predicted to be part of mitochondrial proton-transporting ATP synthase complex and pr…
WBGene00001423	6.6592	fib-1	T01C3.7	fib-1 encodes the C. elegans ortholog of fibrillarin and Saccharomyces cerevisiae Nop1p, an essential component of the U3 SnoRNP; FIB-1 localizes to the nucleolus.	Predicted to enable RNA binding activity; histone-glutamine methyltransferase activity; and rRNA methyltransferase activity. Involved in nucleologenesis and positive regulation of translation. Located in nucleolus and nucleoplasm. Predicted to be part of box C/D RNP complex and small-subunit processome. Is an ortholog of human FBL (fibrillarin).
WBGene00004408	6.6239	rla-0	F25H2.10	rpa-0 encodes an acidic ribosomal subunit protein P0.	Predicted to enable large ribosomal subunit rRNA binding activity. Predicted to be a structural constituent of ribosome. Predicted to be involved in cytoplasmic translation and ribosomal large subunit assembly. Predicted to be located in ribosome. Predicted to be part of cytosolic large ribosomal subunit. Expressed in tail. Is an ortholog of human RPLP0 (ribosomal protein lateral stalk subunit P0…
WBGene00004410	6.5949	rla-2	Y62E10A.1	rla-2 encodes an acidic ribosomal subunit protein P2.	Predicted to be located in ribosome. Expressed in body wall musculature and intestine. Is an ortholog of human RPLP2 (ribosomal protein lateral stalk subunit P2).
WBGene00006924	6.5875	vig-1	F56D12.5	vig-1 encodes a predicted RNA-binding protein orthologous to Drosophila VIG (Vasa Intronic Gene); vig-1 activity is required for proper function of the let-7 miRNA in vivo and thus, for regulating the transition from late larval to adult cell fates; VIG-1 is a component of the 250 kDa RNA-induced silencing complex (RISC) complex and co-immunoprecipates with both TSN-1, the C. elegans Tudor-SN ort…	Predicted to enable RNA binding activity. Predicted to be located in cytoplasm and nucleus. Part of RISC complex. Expressed in neurons. Is an ortholog of human SERBP1 (SERPINE1 mRNA binding protein 1).
WBGene00001884	6.5491	his-10	ZK131.4	his-10 encodes an H4 histone.	Predicted to enable DNA binding activity and protein heterodimerization activity. Involved in defense response to Gram-negative bacterium and innate immune response.
WBGene00017166	6.4763	aldo-2	F01F1.12	aldo-2 encodes a fructose-bisphosphate aldolase homologous to human ALDOB, which when mutated leads to fructosemia, hereditary fructose intolerance (OMIM:229600).	Predicted to enable fructose-bisphosphate aldolase activity. Predicted to be involved in fructose 1,6-bisphosphate metabolic process and glycolytic process. Predicted to be located in cytosol and heterochromatin. Expressed in several structures, including hyp7 syncytium. Human ortholog(s) of this gene implicated in autoimmune disease of the nervous system. Is an ortholog of human ALDOA (aldolase,…
WBGene00004470	6.3758	rps-1	F56F3.5	rps-1 encodes a small ribosomal subunit S3A protein.	Predicted to be a structural constituent of ribosome. Predicted to be involved in translation. Predicted to be located in cytosol. Predicted to be part of cytosolic small ribosomal subunit. Is an ortholog of human RPS3A (ribosomal protein S3A).
WBGene00004430	6.3499	rpl-18	Y45F10D.12	rpl-18 encodes a large ribosomal subunit L18 protein.	Predicted to enable RNA binding activity. Predicted to be a structural constituent of ribosome. Predicted to be involved in translation. Predicted to be located in cytoplasm and ribosome. Predicted to be part of cytosolic large ribosomal subunit. Human ortholog(s) of this gene implicated in Diamond-Blackfan anemia 18. Is an ortholog of human RPL18 (ribosomal protein L18).
WBGene00010419	6.3403	atp-1	H28O16.1	H28O16.1 encodes the C. elegans ortholog of the alpha subunit of mitochondrial ATP synthase.	Enables enterobactin binding activity. Predicted to contribute to proton-transporting ATP synthase activity, rotational mechanism. Involved in iron import into cell. Located in mitochondrion. Predicted to be part of mitochondrial proton-transporting ATP synthase, catalytic core. Expressed in tail. Human ortholog(s) of this gene implicated in combined oxidative phosphorylation deficiency 22; mitoc…
WBGene00004413	6.3367	rpl-2	B0250.1	rpl-2 encodes a large ribosomal subunit L8 protein.	Predicted to enable RNA binding activity. Predicted to be a structural constituent of ribosome. Predicted to be involved in cytoplasmic translation. Predicted to be located in cytoplasm and ribosome. Predicted to be part of cytosolic large ribosomal subunit. Is an ortholog of human RPL8 (ribosomal protein L8).
WBGene00004439	6.3068	rpl-25.2	F52B5.6	rpl-25.2 encodes a large ribosomal subunit L23a protein.	Predicted to be a structural constituent of ribosome. Predicted to be involved in ribosomal large subunit assembly. Predicted to be located in ribosome. Predicted to be part of cytosolic large ribosomal subunit. Is an ortholog of human RPL23A (ribosomal protein L23a).
WBGene00012179	6.2604	W01D2.1	W01D2.1		Predicted to enable RNA binding activity. Predicted to be involved in translation. Predicted to be located in ribosome. Predicted to be part of cytosolic large ribosomal subunit. Is an ortholog of human RPL37 (ribosomal protein L37).
WBGene00006725	6.1739	ubl-1	H06I04.4	ubl-1 encodes a protein similar to Drosophila ubiquitin/ ribosomal protein S27a that affects body length, fertility, and larval viability.	Predicted to enable protein tag and ubiquitin protein ligase binding activity. Predicted to be involved in modification-dependent protein catabolic process and protein ubiquitination. Predicted to be located in cytoplasm and nucleus. Is an ortholog of human RPS27A (ribosomal protein S27a).
WBGene00019322	6.1566	ahcy-1	K02F2.2	ahcy-1 encodes the C. elegans S-adenosylhomocysteine hydrolase (SAHH) ortholog; by homology, AHCY-1 is predicted to catalyze the hydrolysis of S-adenosyl-L-homocysteine to adenosine and L-homocysteine; loss of ahcy-1 activity via RNAi results in embryonic and larval lethality, abnormal body morphology, sick animals, and uncoordinated locomotion; Northern blot analyses indicate the ahcy-1 mRNA is …	Predicted to enable adenosylhomocysteinase activity. Predicted to be involved in S-adenosylhomocysteine catabolic process and S-adenosylmethionine cycle. Predicted to be located in cytosol. Expressed in head. Human ortholog(s) of this gene implicated in hypermethioninemia with deficiency of S-adenosylhomocysteine hydrolase. Is an ortholog of human AHCY (adenosylhomocysteinase).
WBGene00013867	6.0673	ZC373.2	ZC373.2		Enriched in AVK and dopaminergic neurons based on tiling array and RNA-seq studies. Is affected by several genes including daf-16; rrf-3; and daf-12 based on microarray; RNA-seq; and proteomic studies. Is affected by twelve chemicals including Heme; Ethanol; and rotenone based on microarray and RNA-seq studies.
WBGene00004475	5.9378	rps-6	Y71A12B.1	rps-6 encodes a small (40S) ribosomal subunit S6 protein; loss of rps-6 activity in adult animals extends lifespan.	Predicted to be a structural constituent of ribosome. Involved in determination of adult lifespan. Predicted to be located in ribosome. Is an ortholog of human RPS6 (ribosomal protein S6).
WBGene00004798	5.8947	sip-1	F43D9.4	sip-1 encodes a member of the small heat shock family of proteins; loss of sip-1 function via antisense or large-scale RNAi experiments results in embryonic lethality and in a small but reproducible reduction in lifespan in otherwise long-lived animals, respectively, suggesting that sip-1 plays a role in embryonic development as well as regulation of adult lifespan; in addition, expression of sip…	Predicted to enable unfolded protein binding activity. Involved in several processes, including determination of adult lifespan; embryo development; and response to heat. Located in cytosol. Expressed in body wall musculature and gonad.
WBGene00004417	5.8173	rpl-6	R151.3	rpl-6 encodes a large ribosomal subunit L6 protein.	Predicted to enable RNA binding activity. Predicted to be a structural constituent of ribosome. Involved in determination of adult lifespan. Predicted to be located in cytosol; ribosome; and rough endoplasmic reticulum. Predicted to be part of cytosolic large ribosomal subunit. Is an ortholog of human RPL6 (ribosomal protein L6).
WBGene00004494	5.768	rps-25	K02B2.5	rps-25 encodes a small ribosomal subunit S25 protein.	Predicted to be a structural constituent of ribosome. Predicted to be located in ribosome. Predicted to be part of cytosolic small ribosomal subunit. Is an ortholog of human RPS25 (ribosomal protein S25).
WBGene00006930	5.7242	vit-6	K07H8.6	vit-6 encodes a vitellogenin precursor protein that is cleaved in the body cavity into two smaller yolk proteins, YP115 and YP88; in C. elegans, vitellogenin genes exhibit stage-, sex-, and tissue-specific expression being expressed exclusively in the adult hermaphrodite intestine.	Predicted to enable lipid transporter activity. Involved in negative regulation of protein oxidation; negative regulation of reactive oxygen species biosynthetic process; and positive regulation of cholesterol import. Predicted to be located in extracellular region.
WBGene00006434	5.6966	prdx-2	F09E5.15	prdx-2 encodes one of two C. elegans typical 2-Cys peroxiredoxins,peroxidase enzymes that reduce hydrogen peroxide and contributeto the oxidative-stress response of multicellular organisms; loss of prdx-2 activity results in increased sensitivity to sublethal dosesof hydrogen peroxide and increased resistance to heavy metals, likely via increased expression of Phase II detoxification enzymes such…	Enables thioredoxin peroxidase activity. Involved in several processes, including hydrogen peroxide catabolic process; positive regulation of brood size; and response to inorganic substance. Located in cytoplasm. Expressed in body wall musculature; corpus; gonad; head; and tail. Human ortholog(s) of this gene implicated in methylmalonic aciduria and homocystinuria type cblC. Is an ortholog of hum…
WBGene00004497	5.664	rps-28	Y41D4B.5	rps-28 encodes a small ribosomal subunit S28 protein.	Predicted to be a structural constituent of ribosome. Predicted to be involved in cytoplasmic translation; maturation of SSU-rRNA; and ribosomal small subunit assembly. Predicted to be located in cytoplasmic side of rough endoplasmic reticulum membrane. Predicted to be part of cytosolic small ribosomal subunit and polysomal ribosome. Human ortholog(s) of this gene implicated in Diamond Blackfan a…
WBGene00004433	5.6445	rpl-21	C14B9.7	rpl-21 encodes a large ribosomal subunit L21 protein; by homology, RPL-21 is predicted to function in protein biosynthesis; in C. elegans, RPL-21 activity is required for embryonic and germline development.	Predicted to be a structural constituent of ribosome. Predicted to be involved in translation. Predicted to be located in ribosome. Predicted to be part of cytosolic large ribosomal subunit. Human ortholog(s) of this gene implicated in hypotrichosis 12. Is an ortholog of human RPL21 (ribosomal protein L21).
WBGene00000883	5.6114	cyn-7	Y75B12B.2	cyn-7 encodes a cyclophilin A isoform; while not tested for peptidyl-prolyl isomerase activity in vitro, it is very similar to CYN-3 and closely resembles the prototypical CypA, and is therefore likely to be a member of the cytosolic CsA-binding cyclophilin subfamily; CYN-7 was required for embryonic viability in one set of mass RNAi assays.	Predicted to enable cyclosporin A binding activity and peptidyl-prolyl cis-trans isomerase activity. Predicted to be involved in protein folding and protein peptidyl-prolyl isomerization. Predicted to be located in cytoplasm and intracellular membrane-bounded organelle. Is an ortholog of human PPIA (peptidylprolyl isomerase A).
WBGene00004424	5.5969	rpl-12	JC8.3	rpl-12 encodes a large ribosomal subunit L12 protein required in mass RNAi assays for embryonic viability, fertility, normally rapid growth, and general health; the rpl-12 transcription unit has a nonsense transcript that is up-regulated in vivo by smg[-] mutations, indicating that rpl-12 is a natural substrate for SMG-mediated nonsense suppresssion; several other natural mRNA substrates of SMG s…	Predicted to enable large ribosomal subunit rRNA binding activity. Predicted to be a structural constituent of ribosome. Involved in regulation of alternative mRNA splicing, via spliceosome. Predicted to be located in ribosome. Predicted to be part of cytosolic large ribosomal subunit. Expressed in intestine. Human ortholog(s) of this gene implicated in systemic lupus erythematosus. Is an ortholo…
WBGene00002978	5.5254	lev-11	Y105E8B.1	lev-11 encodes tropomyosin, an actin-binding contractile structural protein orthologous to human TROPOMYOSIN 1 (TPM1; OMIM:191010), which when mutated leads to familial hypertrophic cardiomyopathy; LEV-11 is required for embryonic development, normal body morphology, and locomotion; expressed as multiple tissue-specific isoforms generated by alternative mRNA splicing and promoter use, LEV-11 is d…	Enables actin filament binding activity. Involved in several processes, including actin filament organization; regulation of actin polymerization or depolymerization; and spicule insertion. Located in striated muscle thin filament. Expressed in several structures, including body wall musculature; germ line; intestine; non-striated muscle; and pharynx. Human ortholog(s) of this gene implicated in …
WBGene00004450	5.4567	rpl-36	F37C12.4	rpl-36 encodes a large ribosomal subunit L36 protein; by homology, RPL-36 is predicted to function in protein biosynthesis; in C. elegans, RPL-36 activity is required for embryonic and germline development and normal postembryonic growth rates.	Predicted to be a structural constituent of ribosome. Predicted to be involved in cytoplasmic translation. Predicted to be located in cytosol and ribosome. Predicted to be part of cytosolic large ribosomal subunit. Is an ortholog of human RPL36 (ribosomal protein L36).
WBGene00004441	5.4199	rpl-27	C53H9.1	rpl-27 encodes a large ribosomal subunit L27 protein.	Predicted to be a structural constituent of ribosome. Predicted to be involved in translation. Predicted to be located in cytoplasmic side of rough endoplasmic reticulum membrane. Predicted to be part of cytosolic large ribosomal subunit. Human ortholog(s) of this gene implicated in Diamond-Blackfan anemia 16. Is an ortholog of human RPL27 (ribosomal protein L27).
WBGene00004473	5.4026	rps-4	Y43B11AR.4	rps-4 encodes a small ribosomal subunit S4 protein.	Predicted to enable RNA binding activity. Predicted to be a structural constituent of ribosome. Predicted to be involved in translation. Predicted to be located in ribosome. Predicted to be part of cytosolic small ribosomal subunit. Is an ortholog of human RPS4X (ribosomal protein S4 X-linked).
WBGene00001167	5.3782	eef-2	F25H5.4	eef-2 encodes a homolog of translation elongation factor 2 (EF-2), a GTP-binding protein essential for the elongation phase of protein synthesis; eef-2 is required for embryogenesis and vulval morphogenesis, and is expressed during all stages of development, including the dauer larval stage.	Predicted to enable GTPase activity; ribosome binding activity; and translation elongation factor activity. Involved in defense response to Gram-negative bacterium and negative regulation of gene expression. Predicted to be located in cytoplasm. Predicted to be part of ribonucleoprotein complex. Expressed in several structures, including germ line. Human ortholog(s) of this gene implicated in Alz…
WBGene00004482	5.3164	rps-13	C16A3.9	rps-13 encodes a small ribosomal subunit S13 protein; by homology, RPS-13 is predicted to function in protein biosynthesis; in C. elegans, RPS-13 activity is required for embryonic and germline development.	Predicted to enable small ribosomal subunit rRNA binding activity. Predicted to be a structural constituent of ribosome. Predicted to be involved in translation. Predicted to be located in nucleolus. Predicted to be part of cytosolic small ribosomal subunit. Is an ortholog of human RPS13 (ribosomal protein S13).
WBGene00003370	5.1724	mlc-2	C36E6.5	mlc-2 encodes, along with mlc-1 and mlc-4, one of three C. elegans regulatory myosin light chains; MLC-2 is predicted to function as a regulator of myosin ATPase activity, and genetic studies indicate that MLC-2 is nearly essential in hermaphrodites for normal pharyngeal muscle function, but redundant with MLC-1, with which it is nearly identical, for proper bodywall muscle development; according…	Predicted to enable calcium ion binding activity. Involved in several processes, including nematode larval development; regulation of muscle contraction; and regulation of pharyngeal pumping. Predicted to be part of myosin complex. Expressed in body wall musculature; pharyngeal muscle cell; pharynx; and vulval muscle. Human ortholog(s) of this gene implicated in distal arthrogryposis type 1c and …
WBGene00016493	5.1246	C37A2.7	C37A2.7		Predicted to be located in ribosome. Is an ortholog of human RPLP2 (ribosomal protein lateral stalk subunit P2).
WBGene00006928	5.0848	vit-4	F59D8.2		Predicted to enable lipid transporter activity. Predicted to be involved in lipid transport. Predicted to be located in extracellular region.
WBGene00004442	5.0233	rpl-28	R11D1.8	rpl-28 encodes a large ribosomal subunit L28 protein.	Predicted to be a structural constituent of ribosome. Predicted to be involved in translation. Predicted to be located in ribosome. Predicted to be part of cytosolic large ribosomal subunit. Is an ortholog of human RPL28 (ribosomal protein L28).
WBGene00004429	5.0079	rpl-17	Y48G8AL.8	rpl-17 encodes a large ribosomal subunit L17 protein; by homology, RPL-17 is predicted to function in protein biosynthesis; in C. elegans, RPL-17 activity is required for embryonic and germline development, as well as normal postembryonic growth rates.	Predicted to be a structural constituent of ribosome. Predicted to be involved in cytoplasmic translation. Predicted to be located in ribosome. Predicted to be part of cytosolic large ribosomal subunit. Is an ortholog of human RPL17-C18orf32 (RPL17-C18orf32 readthrough).
WBGene00004487	5.0064	rps-18	Y57G11C.16	rps-18 encodes a small ribosomal subunit S18 protein.	Predicted to enable RNA binding activity. Predicted to be a structural constituent of ribosome. Predicted to be involved in translation. Predicted to be located in cytosol. Predicted to be part of small ribosomal subunit. Is an ortholog of human RPS18 (ribosomal protein S18).
WBGene00004481	4.9801	rps-12	F54E7.2	rps-12 encodes a small ribosomal subunit S12 protein; by homology, RPS-12 is predicted to function in protein biosynthesis; in C. elegans, RPS-12 activity is required for embryonic and germline development, normal movement, and the overall health of the animal.	Predicted to be a structural constituent of ribosome. Predicted to be involved in translation. Predicted to be located in ribosome. Predicted to be part of cytosolic small ribosomal subunit. Is an ortholog of human RPS12 (ribosomal protein S12).
WBGene00013025	4.8895	vha-13	Y49A3A.2	vha-13 encodes an ortholog of subunit A of the cytoplasmic (V1) domainof vacuolar proton-translocating ATPase (V-ATPase); VHA-13 is predictedto hydrolyse ATP as part of a cytosolic VHA-12/VHA-13 heterohexamer,whose activity drives the V-ATPase rotor; VHA-13 levels are lowered inmutants with either abnormally low or abnormally high calcineurinlevels, and elevated in mutants lacking both calcineuri…	Predicted to enable proton-transporting ATPase activity, rotational mechanism. Involved in lysosomal lumen acidification. Predicted to be part of proton-transporting V-type ATPase, V1 domain. Expressed in head. Human ortholog(s) of this gene implicated in autosomal recessive cutis laxa type IID and developmental and epileptic encephalopathy 93. Is an ortholog of human ATP6V1A (ATPase H+ transport…
WBGene00000214	4.8607	asp-1	Y39B6A.20	asp-1 encodes a homolog of cathepsin D aspartic protease; it is transcribed exclusively in intestinal cells of the late embryo and early larvae and is not observed in older larvae or adults; ASP-1 is dispensable for neuronal degeneration.	Predicted to enable aspartic-type endopeptidase activity. Predicted to be involved in cell death. Located in cytoplasm and external side of apical plasma membrane. Expressed in intestinal cell and intestine. Is an ortholog of human CTSE (cathepsin E); PGA5 (pepsinogen A5); and PGC (progastricsin).
WBGene00018519	4.8562	F46H5.3	F46H5.3		Predicted to enable kinase activity. Predicted to be involved in phosphocreatine biosynthetic process and phosphorylation. Is an ortholog of human CKMT2 (creatine kinase, mitochondrial 2).
WBGene00006536	4.8439	tbb-1	K01G5.7	This gene encodes a homolog of mammalian beta-tubulin (TUBB) that is expressed at high levels in the germline; TBB-1 is redundant for embryonic viability, due to its paralog TBB-2.	Predicted to enable GTP binding activity. Predicted to be a structural constituent of cytoskeleton. Predicted to be involved in microtubule cytoskeleton organization and mitotic cell cycle. Located in spindle microtubule. Expressed in several structures, including excretory gland cell; intestine; nervous system; pharynx; and uv1. Human ortholog(s) of this gene implicated in several diseases, incl…
WBGene00003371	4.8425	mlc-3	F09F7.2	mlc-3 encodes an essential myosin light chain; large-scale RNAi screens indicate that mlc-3 activity is required for both embryonic and postembryonic development, as well as for normal locomotion and egg laying.	Predicted to enable calcium ion binding activity. Located in striated muscle myosin thick filament. Predicted to be part of myosin complex. Expressed in head neurons; nervous system; tail neurons; and ventral nerve cord. Human ortholog(s) of this gene implicated in familial atrial fibrillation and hypertrophic cardiomyopathy 8. Is an ortholog of several human genes including MYL1 (myosin light ch…
WBGene00004444	4.7834	rpl-30	Y106G6H.3	rpl-30 encodes a large ribosomal subunit L30 protein; by homology, RPL-30 is predicted to function in protein biosynthesis; in C. elegans, loss of rpl-30 function via RNA-mediated interference (RNAi) does not result in any obvious abnormalities.	Predicted to enable RNA binding activity. Predicted to be a structural constituent of ribosome. Involved in determination of adult lifespan. Predicted to be located in ribosome. Predicted to be part of cytosolic large ribosomal subunit. Human ortholog(s) of this gene implicated in herpes simplex. Is an ortholog of human RPL30 (ribosomal protein L30).
WBGene00004492	4.7748	rps-23	F28D1.7	rps-23 encodes a small ribosomal subunit S23 protein; by homology, RPS-23 is predicted to function in protein biosynthesis; in C. elegans, RPS-23 activity is required for germline development, vulval morphogenesis, and the overall health of the animal.	Predicted to be a structural constituent of ribosome. Predicted to be involved in cytoplasmic translation. Predicted to be located in ribosome. Predicted to be part of cytosolic small ribosomal subunit and polysomal ribosome. Is an ortholog of human RPS23 (ribosomal protein S23).
WBGene00004409	4.7599	rla-1	Y37E3.7	rla-1 encodes an acidic ribosomal subunit protein P1.	Predicted to enable protein kinase activator activity and ribonucleoprotein complex binding activity. Predicted to be a structural constituent of ribosome. Predicted to be involved in cytoplasmic translation. Predicted to be located in ribosome. Predicted to be part of cytosolic large ribosomal subunit. Is an ortholog of human RPLP1 (ribosomal protein lateral stalk subunit P1).
WBGene00004436	4.7571	rpl-24.1	D1007.12	rpl-24.1 encodes a large ribosomal subunit L24 protein.	Predicted to enable mRNA binding activity. Predicted to be a structural constituent of ribosome. Predicted to be involved in cytoplasmic translation. Predicted to be located in ribosome. Predicted to be part of cytosolic large ribosomal subunit. Is an ortholog of human RPL24 (ribosomal protein L24).
WBGene00000207	4.6883	asb-2	F02E8.1	asb-2 encodes the B subunit of the membrane-bound F0 proton channel portion of ATP synthase (mitochondrial respiratory chain [MRC] complex V) that is closely similar to its paralog ASB-1; RNAi experiments indicate that asb-2 activity is required for larval development as well as for normal body morphology, lifespan, and growth rate.	Predicted to enable proton transmembrane transporter activity. Predicted to be involved in ATP synthesis coupled proton transport. Predicted to be located in mitochondrial inner membrane. Predicted to be part of mitochondrial proton-transporting ATP synthase complex, coupling factor F(o). Expressed in several structures, including gonad. Human ortholog(s) of this gene implicated in clear cell ren…
WBGene00011156	4.6835	rbm-3.2	R09B3.3		Predicted to enable mRNA binding activity. Predicted to be involved in pre-mRNA cleavage required for polyadenylation. Predicted to be part of mRNA cleavage and polyadenylation specificity factor complex. Is an ortholog of human RBM3 (RNA binding motif protein 3).
WBGene00001889	4.639	his-15	ZK131.9	his-15 encodes an H2B histone.	Predicted to enable DNA binding activity and protein heterodimerization activity. Involved in innate immune response. Predicted to be part of nucleosome.
WBGene00002007	4.6201	hsp-3	C15H9.6	hsp-3 encodes one of two C. elegans heat shock response 70 (hsp70) proteins homologous to mammalian grp78/BiP (glucose regulated protein 78/immunoglobulin heavy chain-binding protein, OMIM:138120); HSP-3 likely functions as a molecular chaperone, and is expressed constitutively (expression is not heat inducible) throughout development with greatest abundance during the L1 larval stage; hsp-3 tran…	Predicted to enable several functions, including ATP binding activity; ATP hydrolysis activity; and misfolded protein binding activity. Involved in IRE1-mediated unfolded protein response. Predicted to be located in endoplasmic reticulum lumen; membrane; and nucleus. Predicted to be part of endoplasmic reticulum chaperone complex. Expressed in several structures, including germ line; hypodermis; …
WBGene00004491	4.5718	rps-22	F53A3.3	rps-22 encodes a small ribosomal subunit S15a protein.	Predicted to be a structural constituent of ribosome. Involved in determination of adult lifespan. Predicted to be located in ribosome. Predicted to be part of cytosolic small ribosomal subunit. Human ortholog(s) of this gene implicated in Diamond-Blackfan anemia 20. Is an ortholog of human RPS15A (ribosomal protein S15a).
WBGene00010317	4.5073	idh-1	F59B8.2	idh-1 encodes a predicted cytosolic isocitrate dehydrogenase; by homology, IDH-1 is predicted to catalyze the formation of alpha-ketoglutarate from isocitrate.	Predicted to enable isocitrate dehydrogenase (NADP+) activity. Predicted to be involved in NADP metabolic process and isocitrate metabolic process. Predicted to be located in cytosol; mitochondrion; and peroxisome. Expressed in tail. Human ortholog(s) of this gene implicated in several diseases, including carcinoma (multiple); glioblastoma; and hematologic cancer (multiple). Is an ortholog of hum…
WBGene00004449	4.5041	rpl-35	ZK652.4	rpl-35 encodes a large ribosomal subunit L35 protein.	Predicted to enable mRNA binding activity. Predicted to be a structural constituent of ribosome. Predicted to be involved in maturation of LSU-rRNA from tricistronic rRNA transcript (SSU-rRNA, 5.8S rRNA, LSU-rRNA). Predicted to be located in ribosome. Predicted to be part of cytosolic large ribosomal subunit. Human ortholog(s) of this gene implicated in Diamond-Blackfan anemia 19. Is an ortholog …
WBGene00006754	4.4822	unc-15	F07A5.7	The unc-15 gene encodes a paramyosin ortholog; UNC-15 protein physically interacts with MHC A, one isoform of myosin heavy chain (MHC) in striated muscle; UNC-15 accumulation is decreased in the absence of UNC-54 (myosin B), implying that degradation of UNC-15 is inhibited by its binding myosin B; conversely, myosin B (but not MYO-3/myosin A) fails to accumulate in unc-15 mutants.	Enables SH3 domain binding activity; cytoskeletal protein binding activity; and protein kinase binding activity. Involved in several processes, including positive regulation of ovulation; positive regulation of sarcomere organization; and skeletal muscle myosin thick filament assembly. Located in A band and myosin filament. Predicted to be part of myosin complex. Expressed in alimentary muscle; b…
WBGene00006936	4.4815	glp-4	Y87G2A.5		Predicted to enable valine-tRNA ligase activity. Involved in determination of adult lifespan. Predicted to be located in cytosol. Human ortholog(s) of this gene implicated in combined oxidative phosphorylation deficiency 20. Is an ortholog of human VARS1 (valyl-tRNA synthetase 1).
WBGene00020915	4.4724	nol-58	W01B11.3		Predicted to enable snoRNA binding activity. Predicted to be involved in ribosome biogenesis. Predicted to be located in nucleolus. Predicted to be part of box C/D RNP complex and small-subunit processome. Is an ortholog of human NOP58 (NOP58 ribonucleoprotein).
WBGene00004446	4.4542	rpl-32	T24B8.1	rpl-32 encodes a large ribosomal subunit L32 protein.	Predicted to be a structural constituent of ribosome. Predicted to be involved in translation. Predicted to be located in ribosome. Predicted to be part of cytosolic large ribosomal subunit. Is an ortholog of human RPL32 (ribosomal protein L32).
WBGene00004469	4.4456	rps-0	B0393.1	rps-0 encodes a small ribosomal subunit SA protein that appears to function as both a ribosomal component and a laminin receptor; by homology, RPS-0 is predicted to play roles in protein biosynthesis and cell adhesion; in C. elegans, RPS-0 activity is required for embryonic and germline development, vulval morphogenesis, and the overall health of the animal.	Predicted to be a structural constituent of ribosome. Predicted to be involved in cytoplasmic translation and ribosomal small subunit assembly. Predicted to be located in cytoplasm and ribosome. Predicted to be part of cytosolic small ribosomal subunit. Expressed in tail. Is an ortholog of human RPSA (ribosomal protein SA).
WBGene00002265	4.4266	lec-2	F52H3.7	lec-2 encodes a 'tandem repeat' type galectin (beta-galactosyl-binding lectin) containing two, tandemly arranged carbohydrate recognition domains; by homology, LEC-2 may play roles in cell adhesion and aggregation, proliferation, or programmed cell death.	Predicted to enable galactoside binding activity. Located in membrane raft and plasma membrane.
WBGene00010627	4.3958	nol-56	K07C5.4		Predicted to enable snoRNA binding activity. Predicted to be involved in ribosome biogenesis. Predicted to be located in nucleolus. Predicted to be part of box C/D RNP complex and small-subunit processome. Human ortholog(s) of this gene implicated in spinocerebellar ataxia type 36. Is an ortholog of human NOP56 (NOP56 ribonucleoprotein).
WBGene00004422	4.382	rpl-11.1	T22F3.4	rpl-11.1 encodes a large ribosomal subunit L11 protein.	Predicted to enable RNA binding activity. Predicted to be a structural constituent of ribosome. Predicted to be involved in translation. Predicted to be located in cytoplasm; nucleus; and ribosome. Predicted to be part of cytosolic large ribosomal subunit. Expressed in germ line. Human ortholog(s) of this gene implicated in Diamond-Blackfan anemia 7 and T-cell acute lymphoblastic leukemia. Is an …
WBGene00004496	4.3796	rps-27	F56E10.4	rps-27 encodes a small ribosomal subunit S27 protein.	Predicted to enable RNA binding activity. Predicted to be a structural constituent of ribosome. Predicted to be involved in ribosomal small subunit assembly. Predicted to be located in ribosome. Predicted to be part of cytosolic small ribosomal subunit. Human ortholog(s) of this gene implicated in Diamond-Blackfan anemia 17. Is an ortholog of human RPS27 (ribosomal protein S27).
WBGene00006921	4.3547	vha-12	F20B6.2	vha-12 encodes an ortholog of subunit B of the cytoplasmic (V1) domainof vacuolar proton-translocating ATPase (V-ATPase); VHA-12 isorthologous to human ATP6V1B1 (OMIM:192132, mutated in distal renaltubular acidosis with progressive sensorineural deafness) and ATP6V1B2(OMIM:606939); VHA-12 and TAG-300/Y110A7A.12 are co-orthologs; VHA-17,like VHA-1 and VHA-12, antagonizes EFF-1-mediated cell fusion…	Predicted to enable ATP binding activity and hydrolase activity. Involved in several processes, including positive regulation of apoptotic process involved in development; positive regulation of neurotransmitter secretion; and regulation of intracellular pH. Predicted to be part of proton-transporting V-type ATPase, V1 domain. Expressed in excretory pore; hypodermal cell; muscle cell; neurons; an…
WBGene00004479	4.3441	rps-10	D1007.6	rps-10 encodes a small (40S) ribosomal subunit S10 protein; loss of rps-10 activity in adult animals extends lifespan.	Predicted to enable RNA binding activity. Predicted to be a structural constituent of ribosome. Involved in determination of adult lifespan. Predicted to be located in ribosome. Predicted to be part of cytosolic small ribosomal subunit. Human ortholog(s) of this gene implicated in Diamond-Blackfan anemia 9. Is an ortholog of human RPS10 (ribosomal protein S10).
WBGene00006926	4.3365	vit-2	C42D8.2	vit-2 encodes the vitellogenin homolog YP170; vit-2 is expressed in the adult hermaphrodite intestine and VIT-2 is secreted into the pseudocoelomic space before being taken up by developing oocytes; vit-2 expression is regulated in a sex-, stage-, and tissue-specific manner by the ELT-2/GATA and MAB-3 transcription factors.	Predicted to enable lipid transporter activity. Predicted to be involved in lipid transport. Located in cytoplasmic vesicle; vesicle lumen; and yolk granule. Expressed in embryonic cell; gonad; intestine; oocyte; and pseudocoelom.
WBGene00000114	4.3364	alh-8	F13D12.4	alh-8 is orthologous to the human gene METHYLMALONATE-SEMIALDEHYDE DEHYDROGENASE (ALDH6A1; OMIM:603178), which when mutated leads to MMSDH deficiency.	Predicted to enable fatty-acyl-CoA binding activity; malonate-semialdehyde dehydrogenase (acetylating) activity; and methylmalonate-semialdehyde dehydrogenase (acylating) activity. Predicted to be involved in thymine catabolic process and valine catabolic process. Located in mitochondrion. Is an ortholog of human ALDH6A1 (aldehyde dehydrogenase 6 family member A1).
WBGene00002065	4.2782	iff-2	F54C9.1		Predicted to enable translation elongation factor activity. Involved in gamete generation; nematode larval development; and sex differentiation. Predicted to be located in cytoplasm. Expressed in excretory cell; hypodermis; pharynx; rectal muscle; and spermatheca. Is an ortholog of human EIF5A (eukaryotic translation initiation factor 5A) and EIF5A2 (eukaryotic translation initiation factor 5A2).
WBGene00009436	4.2739	marb-1	F35G2.2		Predicted to be located in cytoplasm. Is an ortholog of human ISOC2 (isochorismatase domain containing 2).
WBGene00004486	4.2326	rps-17	T08B2.10	rps-17 encodes a small ribosomal subunit S17 protein.	Predicted to be a structural constituent of ribosome. Predicted to be involved in translation. Predicted to be located in ribosome. Human ortholog(s) of this gene implicated in Diamond-Blackfan anemia 4. Is an ortholog of human RPS17 (ribosomal protein S17).
WBGene00009119	4.2299	ndk-1	F25H2.5		Enables identical protein binding activity. Involved in several processes, including positive regulation of MAPK cascade; positive regulation of vulval development; and regulation of engulfment of apoptotic cell. Expressed in head. Human ortholog(s) of this gene implicated in several diseases, including carcinoma (multiple); neuroblastoma; and teratoma. Is an ortholog of human NME1 (NME/NM23 nucl…
WBGene00012608	4.2218	hphd-1	Y38F1A.6		Predicted to enable alcohol dehydrogenase (NAD+) activity and hydroxyacid-oxoacid transhydrogenase activity. Predicted to be involved in glutamate catabolic process via 2-oxoglutarate. Predicted to be located in mitochondrion. Is an ortholog of human ADHFE1 (alcohol dehydrogenase iron containing 1).
WBGene00006917	4.2051	vha-8	C17H12.14	vha-8 encodes an ortholog of subunit E of the cytoplasmic (V1) domain ofvacuolar proton-translocating ATPase (V-ATPase); VHA-8 is a predictedcytosolic stator (stalk) component; VHA-8 is required for embryonic andlarval viability, for ovulation, and for receptor-mediated endocytosisof yolk protein; VHA-8 is highly expressed in the cytoplasm of excretorycanals throughout development, and in the sta…	Predicted to enable P-type proton-exporting transporter activity. Predicted to be involved in proton transmembrane transport. Located in apical plasma membrane and cytoplasm. Predicted to be part of proton-transporting two-sector ATPase complex, catalytic domain. Expressed in head; hypodermis; and intestine. Human ortholog(s) of this gene implicated in autosomal recessive cutis laxa type IIC. Is …
WBGene00001684	4.1949	gpd-2	K10B3.8	gpd-2 encodes one of four C. elegans glyceraldehyde-3-phosphate dehydrogenases (GAPDHs); by homology, GPD-2 is predicted to reversibly catalyze the oxidation and phosphorylation of glyceraldehyde-3-phosphate to 1,3-diphosphoglycerate during glycolysis; in C. elegans, GPD-2 and GPD-3 constitute the major GAPDH isoenzymes and are expressed at highest levels during postembryonic development, primari…	Predicted to enable glyceraldehyde-3-phosphate dehydrogenase (NAD+) (phosphorylating) activity. Predicted to be involved in glycolytic process. Predicted to be located in cytosol. Expressed in several structures, including AB; Psub1; and head. Human ortholog(s) of this gene implicated in Alzheimer's disease. Is an ortholog of human GAPDH (glyceraldehyde-3-phosphate dehydrogenase).
WBGene00001683	4.1613	gpd-1	T09F3.3	gpd-1 encodes one of four C. elegans glyceraldehyde-3-phosphate dehydrogenases (GAPDHs); by homology, GPD-1 is predicted to reversibly catalyze the oxidation and phosphorylation of glyceraldehyde-3-phosphate to 1,3-diphosphoglycerate during glycolysis; GPD-1 is required for embryogenesis, normal body morphology, and gonad development; in C. elegans, GPD-1 and GPD-4 constitute the minor GAPDH isoe…	Predicted to enable glyceraldehyde-3-phosphate dehydrogenase (NAD+) (phosphorylating) activity. Predicted to be involved in glycolytic process. Predicted to be located in cytosol. Expressed in germ line. Human ortholog(s) of this gene implicated in Alzheimer's disease. Is an ortholog of human GAPDH (glyceraldehyde-3-phosphate dehydrogenase).
WBGene00004483	4.1448	rps-14	F37C12.9	rps-14 encodes a small ribosomal subunit S14 protein; by homology, RPS-14 is predicted to function in protein biosynthesis; in C. elegans, RPS-14 activity is required for embryonic and germline development, as well as the overall health of the animal; RPS-14 co-immuoprecipitates with ALG-1, a C. elegans Argonaut ortholog.	Predicted to enable mRNA 5'-UTR binding activity and small ribosomal subunit rRNA binding activity. Predicted to be a structural constituent of ribosome. Predicted to be involved in maturation of SSU-rRNA from tricistronic rRNA transcript (SSU-rRNA, 5.8S rRNA, LSU-rRNA); ribosomal small subunit assembly; and translation. Predicted to be located in ribosome. Predicted to be part of cytosolic small…
WBGene00008920	4.1242	eef-1G	F17C11.9		Predicted to enable translation elongation factor activity. Predicted to be involved in translational elongation. Predicted to be located in cytoplasm and nucleus. Is an ortholog of human EEF1G (eukaryotic translation elongation factor 1 gamma).
WBGene00006919	4.109	vha-10	F46F11.5	vha-10 encodes an ortholog of subunit G of the cytoplasmic (V1) domainof vacuolar proton-translocating ATPase (V-ATPase); VHA-10 is requiredfor necrosis, since vha-10(RNAi) suppresses necrotic neurodegenerationand thapsigargin-induced cell death; VHA-10 is a predicted cytosolicstator (stalk) component.	Predicted to enable ATPase-coupled transmembrane transporter activity. Involved in positive regulation of programmed cell death and programmed cell death. Predicted to be part of vacuolar proton-transporting V-type ATPase complex. Is an ortholog of human ATP6V1G2 (ATPase H+ transporting V1 subunit G2).
WBGene00006439	4.089	ant-1.1	T27E9.1	ant-1.1 encodes one of four C. elegans mitochondrial adenine nucleotide transporters; by homology, ANT-1.1 is predicted to facilitate ADP/ATP exchange between the cytosol and mitochondria; ant-1.1 is an essential gene, required for embryogenesis as well as for normal postembryonic body size and adult lifespan; in addition, ANT-1.1 plays a critical role in promoting somatic and germline programmed…	Predicted to enable ATP:ADP antiporter activity. Involved in determination of adult lifespan; mitochondrion organization; and positive regulation of apoptotic process. Located in mitochondrion. Expressed in several structures, including body wall musculature; hermaphrodite somatic gonadal cell; intestine; pharynx; and vulva. Used to study mitochondrial metabolism disease. Human ortholog(s) of thi…
WBGene00004484	4.0459	rps-15	F36A2.6	rps-15 encodes a small ribosomal subunit S15 protein.	Predicted to be a structural constituent of ribosome. Involved in determination of adult lifespan. Predicted to be located in ribosome. Predicted to be part of cytosolic small ribosomal subunit. Is an ortholog of human RPS15 (ribosomal protein S15).
WBGene00004471	3.8869	rps-2	C49H3.11	rps-2 encodes a small ribosomal subunit S2 protein.	Predicted to be a structural constituent of ribosome. Predicted to be involved in translation. Predicted to be located in ribosome. Predicted to be part of cytosolic small ribosomal subunit. Is an ortholog of human RPS2 (ribosomal protein S2).
WBGene00004476	3.8846	rps-7	ZC434.2	rps-7 encodes a small ribosomal subunit S7 protein.	Predicted to be a structural constituent of ribosome. Predicted to be involved in rRNA processing and ribosomal small subunit biogenesis. Predicted to be located in ribosome. Predicted to be part of cytosolic small ribosomal subunit and small-subunit processome. Human ortholog(s) of this gene implicated in Diamond-Blackfan anemia 8. Is an ortholog of human RPS7 (ribosomal protein S7).
WBGene00004434	3.8406	rpl-22	C27A2.2	rpl-22 encodes a large ribosomal subunit L22 protein; by homology, RPL-22 is predicted to function in protein biosynthesis; in C. elegans, RPL-22 activity is broadly required for embryonic and germline development, as well as normal body coloration, morphology, and postembryonic growth rates.	Predicted to enable RNA binding activity. Predicted to be a structural constituent of ribosome. Predicted to be involved in cytoplasmic translation. Predicted to be located in ribosome. Is an ortholog of human RPL22 (ribosomal protein L22).
WBGene00004495	3.7767	rps-26	F39B2.6	rps-26 encodes a small ribosomal subunit S26 protein; by homology, RPS-26 is predicted to function in protein biosynthesis; in C. elegans, RPS-26 activity is required for embryonic, larval, and germline development, as well as normal locomotion and body morphology.	Predicted to enable mRNA binding activity. Predicted to be a structural constituent of ribosome. Involved in determination of adult lifespan. Predicted to be located in cytoplasmic side of rough endoplasmic reticulum membrane. Predicted to be part of cytosolic small ribosomal subunit and polysomal ribosome. Human ortholog(s) of this gene implicated in Diamond-Blackfan anemia 10. Is an ortholog of…
WBGene00003963	3.7355	pdi-2	C07A12.4	pdi-2 encodes a protein disulfide isomerase beta subunit; by homology, PDI-2 is predicted to function in oxidative protein folding in the endoplasmic reticulum (ER); PDI-2 activity is required for several organismal processes including body morphology, locomotion, fertility, molting, and collagen deposition; pdi-2 transcript levels are increased in response to ER stress; pdi-2 is expressed in the…	Enables protein disulfide isomerase activity and protein-glutamine gamma-glutamyltransferase activity. Contributes to peptidyl-proline 4-dioxygenase activity. Involved in obsolete oxidation-reduction process; peptidyl-proline hydroxylation to 4-hydroxy-L-proline; and protein deglutathionylation. Located in endoplasmic reticulum. Part of procollagen-proline 4-dioxygenase complex. Expressed in seve…
WBGene00004427	3.7335	rpl-15	K11H12.2	rpl-15 encodes a large ribosomal subunit L15 protein.	Predicted to enable RNA binding activity. Predicted to be a structural constituent of ribosome. Predicted to be involved in cytoplasmic translation. Predicted to be located in ribosome. Predicted to be part of cytosolic large ribosomal subunit. Human ortholog(s) of this gene implicated in Diamond-Blackfan anemia 12. Is an ortholog of human RPL15 (ribosomal protein L15).
WBGene00008205	3.7232	sams-1	C49F5.1	sams-1 encodes an S-adenosyl methionine synthetase; by homology, SAMS-1 is predicted to function as a methyl-group donor in many biochemical reactions; sams-1 expression levels are negatively regulated by dietary restriction (as seen in eat-2 mutant animals), suggesting that increased lifespan due to dietary restriction is due, in part, to reducing the activity of key metabolic enzymes; loss of s…	Predicted to enable methionine adenosyltransferase activity. Involved in negative regulation of lipid storage. Predicted to be located in cytosol. Expressed in body wall musculature; dorsal nerve cord; and ventral nerve cord. Used to study lipid metabolism disorder. Human ortholog(s) of this gene implicated in hypermethioninemia. Is an ortholog of human MAT1A (methionine adenosyltransferase 1A) a…
WBGene00004435	3.6746	rpl-23	B0336.10	rpl-23 encodes a large ribosomal subunit L23 protein.	Predicted to enable large ribosomal subunit rRNA binding activity. Predicted to be a structural constituent of ribosome. Predicted to be involved in translation. Predicted to be located in ribosome. Predicted to be part of cytosolic large ribosomal subunit. Is an ortholog of human RPL23 (ribosomal protein L23).
WBGene00004432	3.6698	rpl-20	E04A4.8	rpl-20 encodes a large ribosomal subunit L18a protein.	Predicted to be a structural constituent of ribosome. Predicted to be involved in translation. Predicted to be located in ribosome. Predicted to be part of cytosolic large ribosomal subunit. Is an ortholog of human RPL18A (ribosomal protein L18a).
WBGene00004420	3.6422	rpl-9	R13A5.8	rpl-9 encodes a large ribosomal subunit L9 protein that affects fertility and embryonic viability.	Predicted to be a structural constituent of ribosome. Involved in determination of adult lifespan. Predicted to be located in ribosome. Predicted to be part of cytosolic large ribosomal subunit. Expressed in intestine and tail. Is an ortholog of human RPL9 (ribosomal protein L9).
WBGene00004416	3.5743	rpl-5	F54C9.5	rpl-5 encodes a large ribosomal subunit L5 protein; by homology, RPL-5 is predicted to function in protein biosynthesis; in C. elegans RPL-5 activity is broadly required for embryonic, larval, germline, and vulval development, as well as normal body coloration, morphology, and postembryonic growth rates.	Predicted to enable 5S rRNA binding activity. Predicted to be a structural constituent of ribosome. Predicted to be involved in ribosomal large subunit assembly. Predicted to be located in cytoplasm; nucleus; and ribosome. Predicted to be part of cytosolic large ribosomal subunit. Expressed in hyp7 syncytium; intestine; and pharyngeal cell. Human ortholog(s) of this gene implicated in Diamond-Bla…
WBGene00004480	3.5707	rps-11	F40F11.1	rps-11 encodes a small ribosomal subunit S11 protein; by homology, RPS-11 is predicted to function in protein biosynthesis; in C. elegans, RPS-11 activity is required for embryonic and germline development, as well as the overall health of the animal; loss of rps-11 activity in adult animals extends lifespan.	Predicted to be a structural constituent of ribosome. Involved in determination of adult lifespan. Predicted to be located in ribosome. Predicted to be part of cytosolic small ribosomal subunit. Is an ortholog of human RPS11 (ribosomal protein S11).
WBGene00015391	3.5657	sdha-1	C03G5.1	sdha-1 is orthologous to the human gene SUCCINATE DEHYDROGENASE COMPLEX, SUBUNIT A, FLAVOPROTEIN (SDHA; OMIM:600857), which when mutated leads to complex II mitochondrial respiratory chain deficiency presenting as Leigh syndrome.	Predicted to enable electron transfer activity; flavin adenine dinucleotide binding activity; and succinate dehydrogenase (ubiquinone) activity. Predicted to be involved in mitochondrial electron transport, succinate to ubiquinone. Located in mitochondrion. Predicted to be part of mitochondrial respiratory chain complex II, succinate dehydrogenase complex (ubiquinone). Expressed in head. Human or…
WBGene00004014	3.5094	phb-1	Y37E3.9	phb-1 encodes the C. elegans ortholog of prohibitin PHB1; loss of phb-1 activity via RNAi indicates that phb-1 function is required for mitochondrial organization and morphology and for embryonic, germline, and somatic gonad development; PHB-1, along with prohibitin subunit PHB-2, forms a macromolecular complex that localizes to mitochondrial membranes; PHB-1 and PHB-2 are dependent upon one anot…	Involved in several processes, including developmental process involved in reproduction; mitochondrion morphogenesis; and regulation of oxidative phosphorylation. Located in mitochondrial membrane. Part of mitochondrial prohibitin complex. Expressed in several structures, including body wall musculature; excretory canal; hypodermis; intestine; and pharynx. Human ortholog(s) of this gene implicate…
WBGene00009082	3.4914	dlat-1	F23B12.5	dlat-1 is orthologous to the human gene dihydrolipoyllysine acetyltransferase component of the pyruvate dehydrogenase complex, mitochondrial; dlat-1 is involved in embryo development and reproduction; dlat-1 is predicted to have dihydrolipoyllysine-residue acetyltransferase activity, based on protein domain information; dlat-1 is expressed in the pharynx, anal depressor muscle, nervous system, he…	Predicted to enable dihydrolipoyllysine-residue acetyltransferase activity. Predicted to be involved in acetyl-CoA biosynthetic process from pyruvate. Predicted to be located in mitochondrial matrix. Predicted to be part of mitochondrial pyruvate dehydrogenase complex. Expressed in head and tail. Human ortholog(s) of this gene implicated in pyruvate decarboxylase deficiency. Is an ortholog of hum…
WBGene00022042	3.4578	icd-2	Y65B4BR.5		Predicted to enable unfolded protein binding activity. Predicted to be involved in protein targeting to membrane. Predicted to be located in cytoplasm. Predicted to be part of nascent polypeptide-associated complex. Expressed in intestinal cell. Is an ortholog of human NACA2 (nascent polypeptide associated complex subunit alpha 2).
WBGene00020808	3.4003	clik-1	T25F10.6		Predicted to be located in cytoskeleton.
WBGene00012615	3.3825	dct-16	Y38H6C.1		Enriched in cholinergic neurons; head mesodermal cell; intestine; pharyngeal cell; and retrovesicular ganglion based on tiling array; RNA-seq; proteomic; and microarray studies. Is affected by several genes including daf-16; daf-2; and rrf-3 based on microarray; tiling array; RNA-seq; and proteomic studies. Is affected by fifteen chemicals including Cyclosporine; dimedone; and rotenone based on p…
WBGene00006728	3.3766	ubq-2	ZK1010.1	ubq-2 encodes a bifunctional protein that contains two domains; an N-terminal ubiquitin peptide, and a C-terminal large ribosomal subunit protein L40 peptide.	Predicted to enable protein tag and ubiquitin protein ligase binding activity. Predicted to be a structural constituent of ribosome. Involved in polarity specification of anterior/posterior axis. Predicted to be located in cytoplasm and nucleus. Predicted to be part of cytosolic small ribosomal subunit. Expressed in several structures, including hermaphrodite gonad; intestine; pharyngeal-intestin…
WBGene00004428	3.3748	rpl-16	M01F1.2	rpl-16 encodes a large ribosomal subunit L13a protein.	Predicted to enable mRNA binding activity. Predicted to be a structural constituent of ribosome. Predicted to be involved in negative regulation of translation. Predicted to be located in ribosome. Predicted to be part of cytosolic large ribosomal subunit. Is an ortholog of human RPL13A (ribosomal protein L13a).
WBGene00001155	3.3478	ech-6	T05G5.6		Predicted to enable enoyl-CoA hydratase activity. Predicted to be involved in fatty acid beta-oxidation. Located in mitochondrion. Is an ortholog of human ECHS1 (enoyl-CoA hydratase, short chain 1).
WBGene00004426	3.3366	rpl-14	C04F12.4	rpl-14 encodes a large ribosomal subunit L14 protein.	Predicted to enable RNA binding activity. Predicted to be a structural constituent of ribosome. Predicted to be involved in ribosomal large subunit biogenesis. Predicted to be located in ribosome. Predicted to be part of cytosolic large ribosomal subunit. Human ortholog(s) of this gene implicated in systemic lupus erythematosus. Is an ortholog of human RPL14 (ribosomal protein L14).
WBGene00004488	3.2365	rps-19	T05F1.3	rps-19 encodes a small ribosomal subunit S19 protein, orthologous to human RPS19 (OMIM:603474, mutated in Diamond-Blackfan anemia).	Predicted to enable RNA binding activity. Predicted to be a structural constituent of ribosome. Predicted to be involved in ribosomal small subunit assembly. Predicted to be located in ribosome. Predicted to be part of cytosolic small ribosomal subunit. Human ortholog(s) of this gene implicated in Diamond-Blackfan anemia 1. Is an ortholog of human RPS19 (ribosomal protein S19).
WBGene00004445	3.2215	rpl-31	W09C5.6	rpl-31 encodes a large ribosomal subunit L31 protein.	Predicted to be a structural constituent of ribosome. Predicted to be involved in cytoplasmic translation. Predicted to be located in ribosome. Predicted to be part of cytosolic large ribosomal subunit. Is an ortholog of human RPL31 (ribosomal protein L31).
WBGene00004472	3.1774	rps-3	C23G10.3	rps-3 encodes a small ribosomal subunit S3 protein that contains a KH RNA-binding domain and by homology,is predicted to function in protein biosynthesis; in C. elegans, RPS-3 activity is required for embryonic and germline development, as well as the overall health of the animal.	Predicted to be a structural constituent of ribosome. Predicted to be involved in positive regulation of apoptotic signaling pathway. Predicted to be located in nucleus. Predicted to be part of cytosolic small ribosomal subunit. Is an ortholog of human RPS3 (ribosomal protein S3).
WBGene00001386	3.1477	far-2	F02A9.3	far-2 encodes a protein similar to a class of secreted fatty acid and retinol-binding proteins expressed in parasitic nematodes and secreted in the surrounding tissues of the host; expressed in body wall muscle and vulval cells of adult hermaphrodites, and transcript levels progressively increase during development.	Predicted to enable fatty acid binding activity and retinol binding activity. Predicted to be located in extracellular region. Expressed in body wall musculature; vulval muscle; and in male.
WBGene00006929	3.0852	vit-5	C04F6.1	vit-5 encodes a vitellogenin, a lipid-binding protein precursor related to vertebrate vitellogenins and mammalian ApoB-100, a core LDL particle constituent; by homology, VIT-5 is predicted to function as a lipid transport protein; loss of vit-5 activity via large-scale RNA-mediated interference (RNAi) screens indicates that VIT-5 is required for embryogenesis and normal rates of postembryonic gro…	Predicted to enable lipid transporter activity. Predicted to be involved in lipid transport. Predicted to be located in extracellular region.
WBGene00001000	2.9779	dim-1	C18A11.7	dim-1 encodes novel proteins containing three immunoglobulin-like repeats in the carboxy terminus; dim-1 was originally identified in screens for mutations that suppress locomotion defects caused by aberrant muscle assembly in animals carrying a missense mutation in unc-112, which encodes a pleckstrin homology domain-containing protein required for the early stages of muscle assembly; loss-of-fun…	Predicted to be involved in axon guidance and cell adhesion. Predicted to be located in cytoplasm and plasma membrane. Expressed in body wall musculature. Human ortholog(s) of this gene implicated in dilated cardiomyopathy 1KK and nemaline myopathy 11. Is an ortholog of human MYPN (myopalladin).
WBGene00004421	2.9597	rpl-10	F10B5.1	rpl-10 encodes a large ribosomal subunit L10 protein required in mass RNAi assays for embryonic viability, fertility, normally rapid growth, and normal body coloration; the rpl-10 transcription unit has a nonsense transcript that is up-regulated in vivo by smg[-] mutations, indicating that rpl-10 is a natural substrate for SMG-mediated nonsense suppresssion; several other natural mRNA substrates …	Predicted to be a structural constituent of ribosome. Predicted to be involved in ribosomal large subunit assembly. Predicted to be located in ribosome. Predicted to be part of cytosolic large ribosomal subunit. Expressed in head; pharyngeal muscle cell; and tail. Human ortholog(s) of this gene implicated in autistic disorder and syndromic X-linked mental retardation 35. Is an ortholog of human R…
WBGene00018846	2.9422	eef-1B.1	F54H12.6		Predicted to enable guanyl-nucleotide exchange factor activity. Predicted to be involved in translational elongation. Predicted to be located in cytosol. Is an ortholog of human EEF1B2 (eukaryotic translation elongation factor 1 beta 2).
WBGene00004431	2.938	rpl-19	C09D4.5	rpl-19 encodes a large ribosomal subunit L19 protein.	Predicted to enable RNA binding activity. Predicted to be a structural constituent of ribosome. Involved in determination of adult lifespan. Predicted to be located in ribosome. Predicted to be part of cytosolic large ribosomal subunit. Is an ortholog of human RPL19 (ribosomal protein L19).
WBGene00008505	2.9336	F01G4.6	F01G4.6		Predicted to enable inorganic phosphate transmembrane transporter activity. Predicted to be involved in phosphate ion transmembrane transport. Predicted to be integral component of mitochondrial inner membrane. Is an ortholog of human SLC25A3 (solute carrier family 25 member 3).
WBGene00006586	2.9216	tni-4	W03F8.1	tni-4 encodes one of the four elegans troponin I proteins; tni-4 is required for the normal development of the pharynx during embryonic development; TNI-4 interacts only with the pharyngeal troponin C; tni-4 is expressed exclusively in the pharyngeal muscles.	Enables troponin C binding activity. Involved in embryo development and pharyngeal pumping. Located in sarcomere. Predicted to be part of troponin complex. Expressed in pharyngeal muscle cell and pharynx. Human ortholog(s) of this gene implicated in several diseases, including arthrogryposis multiplex congenita; distal arthrogryposis type 2B1; and intrinsic cardiomyopathy (multiple). Is an orthol…
WBGene00019900	2.8266	vdac-1	R05G6.7		Predicted to enable voltage-gated anion channel activity. Involved in mitochondrion organization. Predicted to be located in mitochondrial outer membrane. Predicted to be part of pore complex. Expressed in AWCL and AWCR. Human ortholog(s) of this gene implicated in Parkinson's disease; Parkinsonism; and prostate cancer. Is an ortholog of human VDAC1 (voltage dependent anion channel 1); VDAC2 (vol…
WBGene00002010	2.8124	hsp-6	C37H5.8	hsp-6 encodes a nuclear-encoded mitochondrion-specific chaperone that is a member of the DnaK/Hsp70 superfamily of molecular chaperones; hsp-6 is involved in the mitochondrial unfolded protein response, as hsp-6 expression, normally broadly detected from the L1 larval through adult stages of development, is greatly increased in response to treatments that disrupt mitochondrial protein handling; l…	Predicted to enable several functions, including ATP binding activity; ATP hydrolysis activity; and misfolded protein binding activity. Involved in mitochondrial unfolded protein response. Located in mitochondrion. Expressed in muscle cell. Human ortholog(s) of this gene implicated in Alzheimer's disease; Parkinson's disease; autosomal dominant sideroblastic anemia 4; and rheumatoid arthritis. Is…
WBGene00000915	2.8085	hsp-90	C47E8.5	daf-21 encodes a member of the Hsp90 family of molecular chaperones; DAF-21 activity is required for larval development, negative regulation of dauer larva formation, and a number of specific chemosensory behaviors, such as the response to chemicals and odorants detected by the ASE and AWC sensory neurons; a daf-21 sensory defect can be rescued by a cyclic GMP analogue, suggesting that, in regula…	Enables several functions, including ATP hydrolysis activity; glucocorticoid receptor binding activity; and protein phosphatase 5 binding activity. Involved in several processes, including positive regulation of phosphoprotein phosphatase activity; protein export from nucleus; and protein stabilization. Located in perinuclear region of cytoplasm and protein-containing complex. Expressed in severa…
WBGene00000833	2.7284	cts-1	T20G5.2	cts-1 encodes a citrate synthase; by homology, CTS-1 is predicted to function in the citric acid cycle to catalyze the formation of citrate from oxaloacetate and acetyl-CoA; cts-1 is required for embryonic development.	Predicted to enable citrate (Si)-synthase activity. Predicted to be involved in carbohydrate metabolic process and tricarboxylic acid cycle. Located in mitochondrion. Expressed in anal depressor muscle and ventral cord neurons. Is an ortholog of human CS (citrate synthase).
WBGene00006436	2.7284	ttn-1	W06H8.8	ttn-1, through multiple splicing, encodes at least six protein isoformsthat are orthologs of titin (OMIM:188840, mutated in cardiomyopathy ortibial muscular dystrophy), with the three largest isoforms being 2.2MDa, 1.2 MDa and 301 kDa; TTN-1 isoforms are expressed in body wall andvulval muscle, localized to the centers of I-bands, with the two largestisoforms expressed in all muscles except phary…	Enables actin filament binding activity and myosin binding activity. Predicted to be involved in protein phosphorylation. Located in A band and I band. Expressed in muscle cell.
WBGene00016630	2.6681	acer-1	C44B7.10		Predicted to enable acetate CoA-transferase activity and acetyl-CoA hydrolase activity. Predicted to be involved in acetate metabolic process and propionate metabolic process, methylcitrate cycle. Expressed in several structures, including germ line.
WBGene00008506	2.6191	tkt-1	F01G10.1	tkt-1 encodes an ortholog of the human gene TRANSKETOLASE (TKT; OMIM:606781), which when mutated leads to Wernicke-Korsakoff syndrome (OMIM:277730).	Predicted to enable thiamine pyrophosphate binding activity and transketolase activity. Is an ortholog of human TKT (transketolase) and TKTL2 (transketolase like 2).
WBGene00022089	2.5987	Y69A2AR.18	Y69A2AR.18		Predicted to enable proton-transporting ATP synthase activity, rotational mechanism. Predicted to be involved in ATP synthesis coupled proton transport. Predicted to be located in membrane. Predicted to be part of proton-transporting ATP synthase complex, catalytic core F(1). Expressed in tail. Human ortholog(s) of this gene implicated in obesity. Is an ortholog of human ATP5F1C (ATP synthase F1 …
WBGene00001385	2.4853	far-1	F02A9.2	far-1 encodes a fatty acid/retinol binding protein; expressed throughout development with highest expression levels in L3 stage larvae and in adult males.	Predicted to enable lipid binding activity. Predicted to be located in extracellular region. Expressed in male.
WBGene00004474	2.4724	rps-5	T05E11.1	rps-5 encodes a small ribosomal subunit S5 protein.	Predicted to enable mRNA binding activity and rRNA binding activity. Predicted to be a structural constituent of ribosome. Predicted to be involved in ribosomal small subunit assembly and translation. Predicted to be located in ribosome. Predicted to be part of cytosolic small ribosomal subunit. Is an ortholog of human RPS5 (ribosomal protein S5).
WBGene00002064	2.4718	iff-1	T05G5.10	iff-1 encodes an eIF-5A homolog that affects fertility and is required for germ cell proliferation and for some P granule components to localize properly; expression is germline specific and mRNA is expressed in the distal region of gonads where germ cells actively proliferate.	Predicted to enable translation elongation factor activity. Involved in gamete generation and protein localization. Predicted to be located in cytoplasm. Expressed in germ line and gonad. Is an ortholog of human EIF5A (eukaryotic translation initiation factor 5A) and EIF5A2 (eukaryotic translation initiation factor 5A2).
WBGene00003162	2.3934	mdh-2	F20H11.3	mdh-2 encodes a homolog of malate dehydrogenase that is predicted to be mitochondrial.	Predicted to enable L-malate dehydrogenase activity. Predicted to be involved in malate metabolic process and tricarboxylic acid cycle. Located in mitochondrion. Human ortholog(s) of this gene implicated in developmental and epileptic encephalopathy 51. Is an ortholog of human MDH2 (malate dehydrogenase 2).
WBGene00000041	2.3228	aco-2	F54H12.1	aco-2 encodes an aconitase homolog that is required for embryonic viability, fertility, locomotion, and vulval morphogenesis, and perhaps for normal lifespan.	Predicted to enable 4 iron, 4 sulfur cluster binding activity and aconitate hydratase activity. Predicted to be involved in tricarboxylic acid cycle. Located in mitochondrion. Expressed widely. Human ortholog(s) of this gene implicated in infantile cerebellar-retinal degeneration and optic atrophy 9. Is an ortholog of human ACO2 (aconitase 2).
WBGene00003989	2.1751	pfn-1	Y18D10A.20	pfn-1 encodes a profilin; pfn-1 is required for embryonic cytokinesis, specifically for the assembly or maintenance of cortical microfilaments and myosin; PFN-1 physically interacts with the CYK-1 Formin Homology protein; PFN-1 localizes to the cell cortex.	Predicted to enable actin monomer binding activity. Predicted to be involved in sequestering of actin monomers. Predicted to be located in cell cortex. Expressed in gonadal sheath cell; nerve ring; neurons; spermatheca; and vulva.
WBGene00011884	2.0909	enol-1	T21B10.2	enol-1 is orthologous to human ENOLASE 1 (also CRYSTALLIN, TAU; ENO1; OMIM:172430), which when mutated leads to spherocytic red cell enolase deficiency.	Predicted to enable phosphopyruvate hydratase activity. Predicted to be involved in glycolytic process and regulation of vacuole fusion, non-autophagic. Predicted to be located in cytoplasm. Predicted to be part of phosphopyruvate hydratase complex. Expressed in head. Human ortholog(s) of this gene implicated in several diseases, including Alzheimer's disease; migraine without aura; neuroendocrin…
WBGene00002258	2.0903	lbp-6	W02D3.5		Predicted to enable lipid binding activity. Human ortholog(s) of this gene implicated in several diseases, including Alzheimer's disease; Down syndrome; artery disease (multiple); and type 2 diabetes mellitus. Is an ortholog of human FABP3 (fatty acid binding protein 3) and FABP7 (fatty acid binding protein 7).
WBGene00007385	2.0845	atp-5	C06H2.1		Predicted to enable proton transmembrane transporter activity. Predicted to be involved in ATP synthesis coupled proton transport. Predicted to be located in mitochondrial inner membrane. Predicted to be part of mitochondrial proton-transporting ATP synthase, stator stalk. Is an ortholog of human ATP5PD (ATP synthase peripheral stalk subunit d).
WBGene00011110	2.0177	prdx-3	R07E5.2	prdx-3 encodes one of two C. elegans typical 2-Cys peroxiredoxins,peroxidase enzymes that reduce hydrogen peroxide and contributeto the oxidative-stress response of multicellular organisms.	Predicted to enable thioredoxin peroxidase activity. Predicted to be involved in cell redox homeostasis and cellular response to oxidative stress. Predicted to be located in mitochondrion. Is an ortholog of human PRDX3 (peroxiredoxin 3).
WBGene00020950	1.8153	dlst-1	W02F12.5		Predicted to enable dihydrolipoyllysine-residue succinyltransferase activity. Predicted to be involved in L-lysine catabolic process to acetyl-CoA via saccharopine and tricarboxylic acid cycle. Predicted to be part of oxoglutarate dehydrogenase complex. Human ortholog(s) of this gene implicated in Alzheimer's disease and paraganglioma. Is an ortholog of human DLST (dihydrolipoamide S-succinyltran…
WBGene00002083	1.6177	inf-1	F57B9.6	inf-1 encodes a protein with high similarity to eukaryotic initiation factor 4A.	Predicted to enable translation initiation factor activity. Predicted to be involved in cytoplasmic translational initiation. Expressed in germ line; intestine; and neurons. Is an ortholog of human EIF4A1 (eukaryotic translation initiation factor 4A1).
