# Supplementary material for: A CDK-11/SAP30BP/CYL-1 Complex Links Pre-mRNA Splicing to Developmental Cell Fate Decisions
Source: Research Square preprint supplement (doi:10.21203/rs.3.rs-7629361/v1), 2025-10-07
Supplement: Supplementary file 2 [file 3641f7a5db539b01798916a5.xlsx]

## Sheet: Sheet1
Supplemantal Table S3 . Genotype of worm strains used or generated in this study
Strain name	Genotype
ZZY4063	unc-119(tm4063)
RW10226	unc-119(ed3) III; ltls37 [pie-1p::mCherry::his-58 + unc-119(+)] IV; stls10226 [his-72p::HIS-24::mCherry::let-858 3’ UTR + unc-119(+)]
RW10029	unc-119(ed3) III; zuls178 [his-72(1kb 5’ UTR)::HIS-72::SRPVAT::GFP::his-72(1KB 3’UTR) + 5.7 kb Xbal – HindIII unc-119(+)]; stls10024 [pie-1::H2B::GFP::pie-1 3’ UTR + unc-119(+)]
ZZY0668	unc-119(ed3) III; zzySi151 [cyl-1p::CYL-1::GFP::cyl-1 3’ UTR + unc-119(+)] II
ZZY0676	zzySi151 [cyl-1p::CYL-1::GFP::cyl-1 3’ UTR + unc-119(+)] II; ltls37 [pie-1p::mCherry::his-58 + unc-119(+)] IV; stls10226 [his-72p::HIS-24::mCherry::let-858 3’ UTR + unc-119(+)]
ZZY0747	cyl-1(ok816) V; zzySi151 [cyl-1p::CYL-1::GFP::cyl-1 3’ UTR + unc-119(+)] II
ZZY0825	unc-119(ed3) III; zzySi195 [Y67D2.7p::Y67D2.7::mCherry::Y67D2.7 3’ UTR + unc-119(+)]
ZZY0838	zzySi195 [Y67D2.7p::Y67D2.7::mCherry::Y67D2.7 3’ UTR + unc-119(+)]; zuls178 [his-72(1kb 5’ UTR)::HIS-72::SRPVAT::GFP::his-72 (1KB 3’UTR) + 5.7 kb Xbal – HindIII unc-119(+)]; stls10024 [pie-1::H2B::GFP::pie-1 3’ UTR + unc-119(+)]
VC587	cyl-1(ok816) V/nT1 [qls51] (IV;V)
