# Supplementary material for: A CDK-11/SAP30BP/CYL-1 Complex Links Pre-mRNA Splicing to Developmental Cell Fate Decisions
Source: Research Square preprint supplement (doi:10.21203/rs.3.rs-7629361/v1), 2025-10-07
Supplement: Supplementary file 4 [file 85b5368408f5bb578bca8d23.xlsx]

## Sheet: Sheet1
Supplemental Table S4: Plasmids used in this study
Plasmid name	Details
pCFJ601	Peft-3 Mos 1transposase
pMA122	peel-1 negative selection
pGH8	pRab-3::mCherry::unc-54utr
pCFJ90	pmyo-2::mCherry::unc-54utr
pCFJ104	pmyo-3::mCherry::unc-54
pCeh361	dpy-5(+)
pZZ31	Cbr-Pmyo-2::HIS-72::GFP; unc-119(+)
pZZ151	A1::pcyl-1::CYL-1::GFP::cyl-1 3’ UTR
pZZ195	A1::pEELO-1::EELO-1::mCherry::EELO-1 3’ UTR
pZZ197	phsp16.41-Myc-CYL-1-VN173
pZZ198	phsp16.41-Myc-EELO-1-VN173
pZZ199	phsp16.41-HA-CYL-1-VC155
pZZ200	phsp16.41-HA-EELO-1-VC155
pZZ203	Cbr-Pmyo-2 (9k)::HIS-72::GFP; unc-119(+)
